# Supplementary material for: Platelike carbon-encapsulated nickel nanocrystals for efficient electrooxidation of 5-hydroxymethylfurfural
Source: Royal Society of Chemistry journal article supplement (doi:10.1039/d4cc01443j), 2024-01-01
Supplement: d4cc01443j1.pdf [file d4cc01443j1.pdf]

## **Electronic Supplementary Information (ESI)**

### **Platelike carbon-encapsulated nickel nanocrystals for efficient electrooxidation of 5-hydroxymethylfurfural**

Ting Sang,<sup>a</sup> Hui Xu,<sup>a</sup> Wenke Wang,<sup>a</sup> Dongfang Ji,<sup>a</sup> Jingcheng Hao,<sup>a</sup> Zhonghao Li<sup>\*a</sup>

<sup>a</sup> Key Laboratory of Colloid and Interface Chemistry, Ministry of Education,

Shandong University, Jinan, 250100, China, E-mail: zhonghaoli@sdu.edu.cn

## **Experimental Section**

### **Materials and Chemicals**

Choline chloride (ChCl), oxalic acid ( $\text{H}_2\text{C}_2\text{O}_4$ ), potassium chloride (KCl) and nickel powder were purchased from Aladdin Chemistry Co., Ltd. Nickel chloride hexahydrate ( $\text{NiCl}_2 \cdot 6\text{H}_2\text{O}$ ) and Potassium hydroxide (KOH) were obtained from Sinopharm Chemical Reagent Co., Ltd. 5-hydroxymethylfurfural (HMF), 2,5-furandicarboxylic acid (FDCA), 5-hydroxymethyl-2-furancarboxylic acid (HMFCA) and 5-formyl-2-furancarboxylic acid (FFCA) were purchased from Alfa-Aesar. 2,5-diformylfuran (DFF) was purchased from Tokyo Chemical Industry Co., Ltd. 5 wt% Nafion solution was purchased from the Sigma Co., Ltd. Carbon cloth was obtained from Changsha Lyrun Material Co., Ltd. Nickel foam was purchased from Suzhou Siner Technology Co., Ltd. Nafion 115 membrane was purchased from Wuhan GaossUnion technology Co., Ltd.

### **Synthesis of choline chloride/oxalic acid (ChCl/OA) DES**

The deep eutectic solvent (DES) was synthesized according to the previous literature.<sup>1</sup> Specifically, the colorless and transparent (ChCl/OA) DES was obtained by mixing equimolar amounts of choline chloride and oxalic acid, followed by magnetic stirring at 80 °C.

### **Synthesis of platelike carbon-encapsulated nickel nanocrystals (Ni@C)**

In a typical procedure, 100.0 mg  $\text{NiCl}_2 \cdot 6\text{H}_2\text{O}$  were added in 1 mL of ChCl/OA DES and subjected the solution to ultrasonic treatment at 50 °C until a uniformly

dispersed solution was obtained. Then, the above solution was transferred to a microwave oven for microwave heating at 100 W for 15 s to achieve the Ni-based precursors. Subsequently, the precursors was recovered, washed with ethanol and dried under vacuum oven.

Then, the dried precursors were put in a quartz tube of the tube furnace and heat-treated at 450 °C for 2 h with 10 °C min<sup>-1</sup> in N<sub>2</sub> atmosphere to achieve the platelike Ni@C. The platelike Ni@C was washed by water and ethanol, and then dried in the vacuum oven. The achieved product was labeled as Ni@C-450 (for convenience, we labeled Ni@C achieved at various pyrolysis temperature as Ni@C-X, where X represented pyrolysis temperature).

In order to make comparisons, Ni@C-400 and Ni@C-500 were prepared by adjusting the pyrolysis temperature to 400 °C and 500 °C, using the same preparation method as Ni@C-450.

## **Characterizations**

The X-ray diffraction (XRD) pattern was characterized on the Rigaku SmartLab 9 KW X-ray diffractometer. Transmission electron microscopy (TEM) was performed on the JEM-1400 microscope. High-resolution transmission electron microscopy (HRTEM) and energy-dispersive X-ray (EDX) were tested on the FEI Talos F200x. X-ray photoelectron spectroscopy (XPS) measurements were carried out using the Thermo Fisher ESCALAB XI. Thermogravimetric (TG) analysis was performed using the TGA/DSC3+ analyzer. Nitrogen adsorption-desorption experiments were

conducted on the micropolitics ASAP 2460. High-performance liquid chromatography (HPLC) analysis was performed using the Agilent G7114A system.

### **Electrochemical Measurements**

CHI760E electrochemical workstation was used for electrochemical tests. A catalyst suspension was created by combining 5.0 mg of the as-prepared catalyst with 20  $\mu\text{L}$  of a 5 wt% Nafion solution, along with 100  $\mu\text{L}$  of ethanol and 80  $\mu\text{L}$  of deionized water, followed by sonication. Subsequently, 200  $\mu\text{L}$  of the catalyst ink was casted on a carbon cloth ( $1 \times 1 \text{ cm}^2$ ) to establish a working electrode. Pt foil and saturated Ag/AgCl electrode were utilized as counter electrode and reference electrode. For control, nickel foam ( $1 \times 1 \text{ cm}^2$ ) was also used as the electrode for the HMF electrooxidation study. The potentials in this experiment were referenced to the reversible hydrogen electrode (RHE):

$$E (\text{RHE}) = E (\text{Ag/AgCl}) + 0.197 + 0.059 \times \text{pH}$$

The linear sweep voltammetry (LSV) was performed at  $10 \text{ mV s}^{-1}$  in 10 mL 1.0 M KOH electrolyte (with and without 10 mM HMF). Cyclic voltammetry (CV) used to measure the electrochemical double-layer capacitance ( $C_{dl}$ ), which was carried out in 1 M KOH electrolyte (10 mM HMF) at 40, 50, 60, 70, 80 and  $90 \text{ mV s}^{-1}$ , with no Faraday processes occurring in the potential window. Electrochemical impedance spectroscopy (EIS) was conducted from 1 Hz to 100 kHz. HMF electrolysis at constant potential (1.34 V) was performed with a two-compartment cell separated by a Nafion 115 membrane. The electrooxidation of HMF occurred in the anode chamber containing 10 mL electrolyte (1 M KOH with 10 mM HMF).

## Products analysis

High-performance liquid chromatography (HPLC) with a 4.6 mm × 250 mm Zorbax SB-C18 5 μm column and a UV-Vis detector (265 nm) was applied to determine the concentrations of the components. In the constant potential electrolysis test (1.34 V), 10 μL of the electrolyte was taken out and diluted to 500 μL by ultrapure water. Then, a 10 μL volume of the diluted electrolyte was injected into the HPLC for analysis at 30 °C. 30% methanol with 70% ammonium formate aqueous solution (5 mM) was used as the eluent. Calibration curves for HPLC were achieved by standard solution.

HMF conversion, FDCA yield and Faraday efficiency (FE) were achieved by the below equations:

$$\text{HMF conversion (\%)} = [n(\text{HMF consumed}) / n(\text{HMF initial})] \times 100$$

$$\text{FDCA yield (\%)} = [n(\text{FDCA formed}) / n(\text{HMF initial})] \times 100$$

$$\text{Faraday efficiency (\%)} = [n(\text{FDCA formed}) / (Q / (6 \times F))] \times 100$$

wherein  $Q$  is total transferred charge,  $F$  is Faraday constant (96485 C mol<sup>-1</sup>) and  $n$  is the mole number of reactant.

## Density functional theory (DFT) Calculation

The Vienna Ab-initio Simulation Package (VASP) was employed to conduct all Density Functional Theory (DFT) calculations.<sup>2,3</sup> The Perdew-Burke-Ernzerhof (PBE) exchange-correlation functional with Grimme D3 dispersion correction, employing the generalized gradient approximation (GGA) method, was utilized in this study.<sup>4,5</sup> The projected augmented wave (PAW) method was utilized to describe core-valence

interactions in all DFT calculations.<sup>6</sup> The energy cutoff for plane wave expansions was set to 450 eV, and the  $1 \times 1 \times 1$  Monkhorst-Pack grid k-points were used to sample the Brillouin zone integration for structural optimization. 15 Å vacuum was applied to both the upper and lower surfaces of the model to eliminate image interactions. Structural optimization was carried out with energy and force convergence criteria setting at  $1.0 \times 10^{-5}$  eV and  $0.02 \text{ eV \AA}^{-1}$ , respectively.

The adsorption energy of HMF was calculated according to the following equation:

$$E_{\text{ads}} = E_{\text{ad/sub}} - E_{\text{ad}} - E_{\text{sub}}$$

where  $E_{\text{ad/sub}}$ ,  $E_{\text{ad}}$ , and  $E_{\text{sub}}$  are the total energies of the optimized adsorbate/substrate system, the adsorbate in the gas phase, and the clean substrate, respectively.

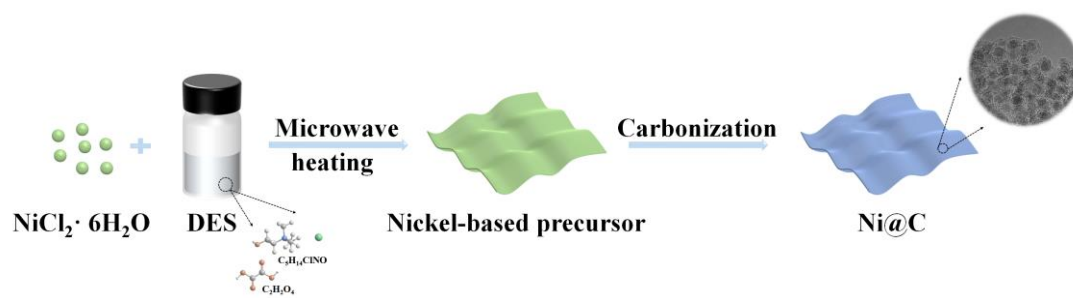

**Fig. S1** Schematic diagram of platelike Ni@C synthesis.

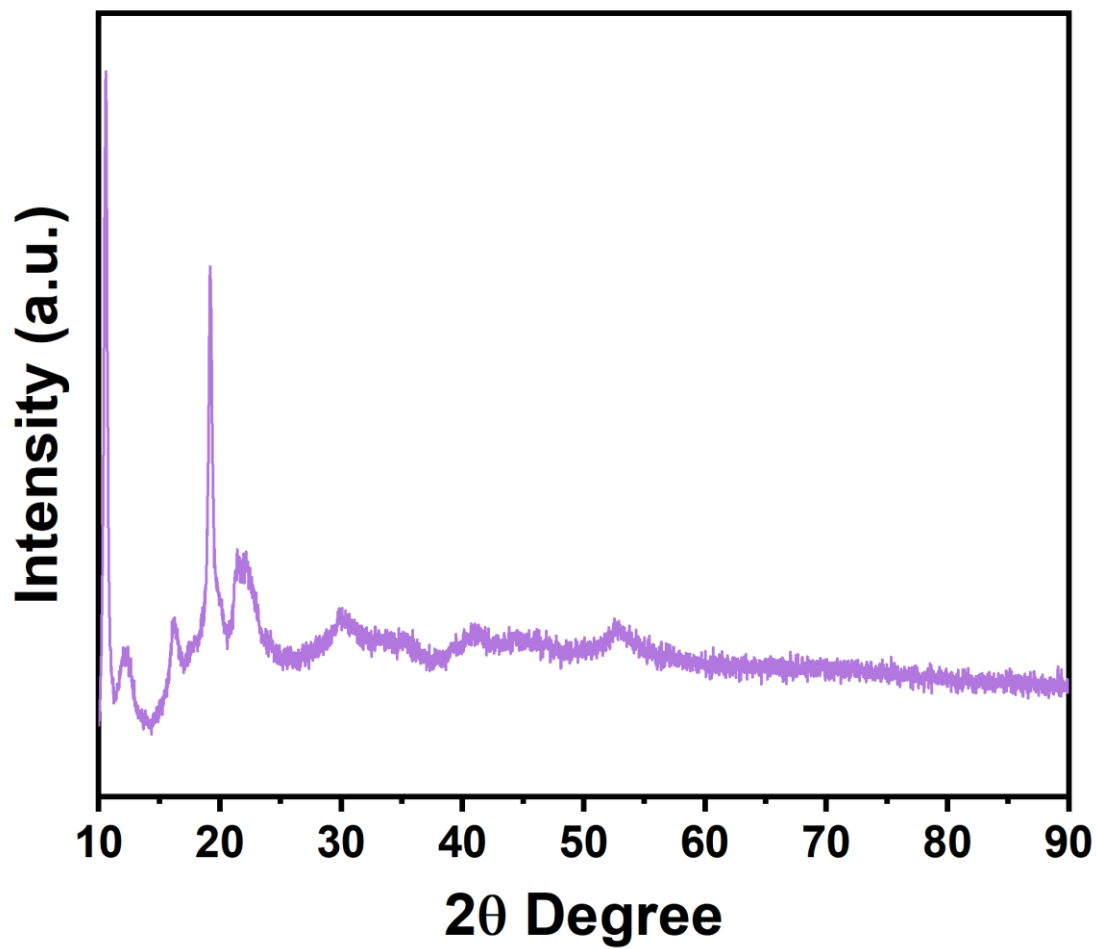

**Fig. S2** XRD pattern of the Ni precursors obtained after microwave heating 1 mL ChCl/OA DES with 100.0 mg NiCl<sub>2</sub> · 6H<sub>2</sub>O.



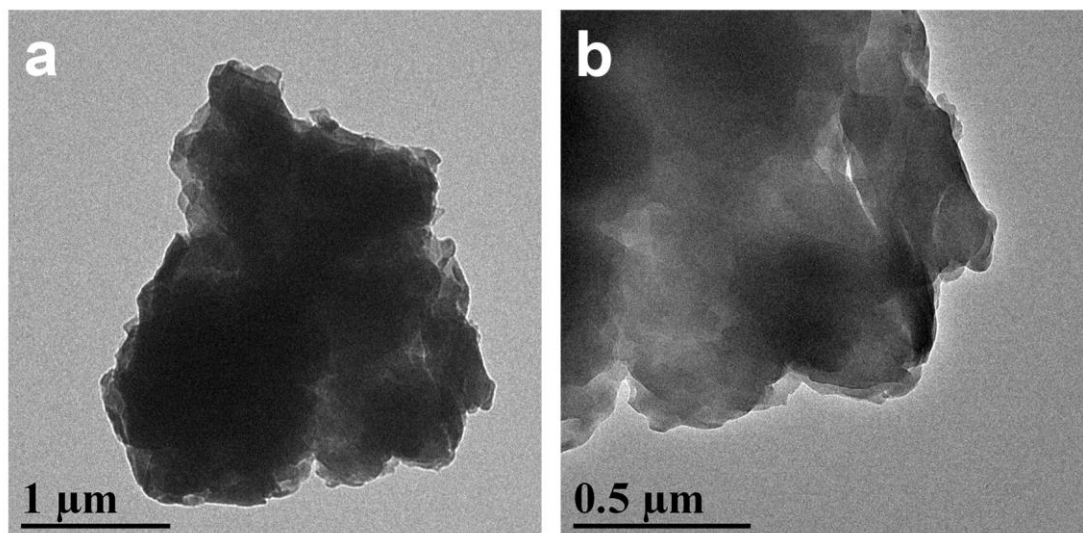

**Fig. S3** Low- and high- magnification TEM images of the Ni precursor obtained after microwave heating 1 mL ChCl/OA DES with 100.0 mg NiCl<sub>2</sub> 6H<sub>2</sub>O. The precursor will be used for synthesizing platelike Ni@C.

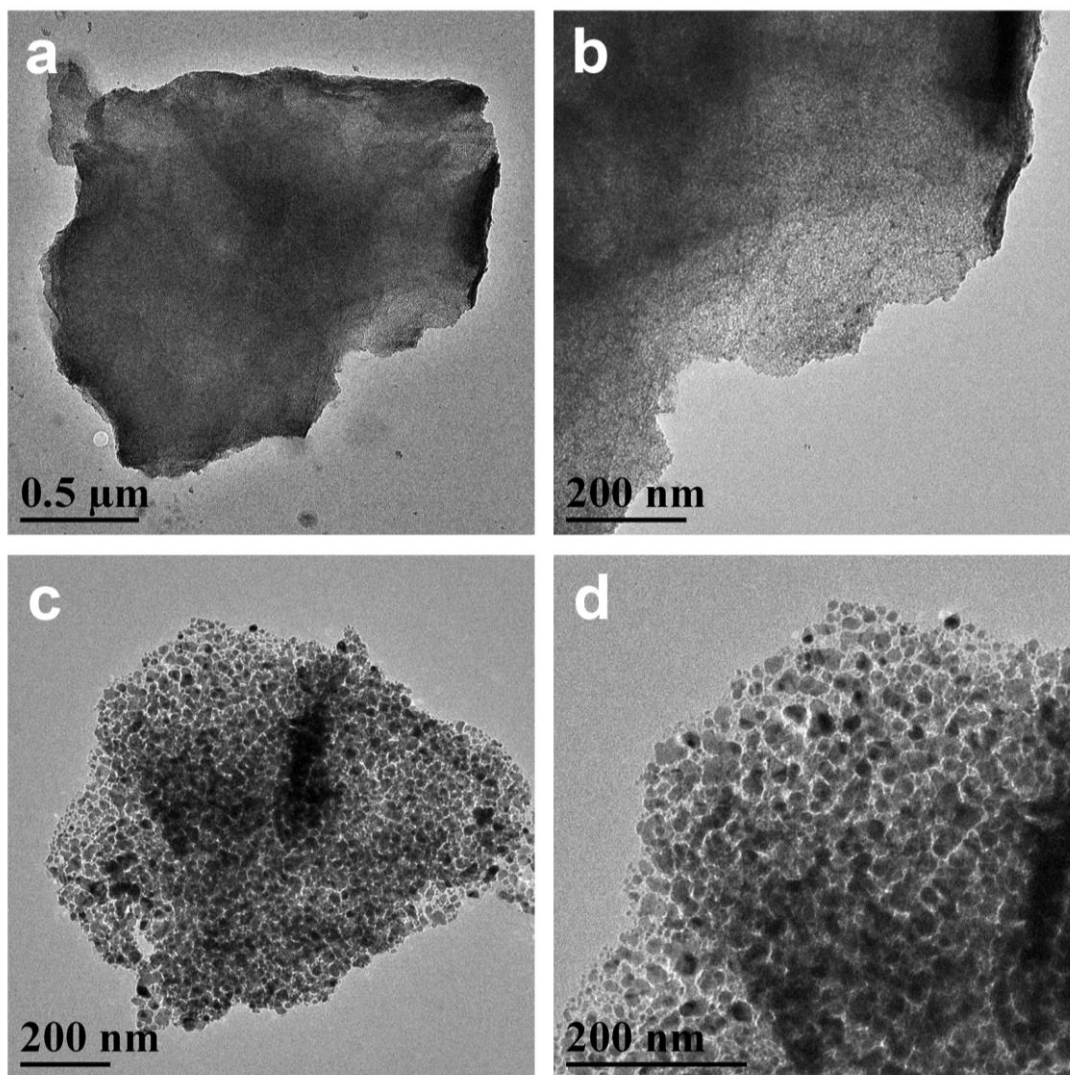

**Fig. S4** TEM images of (a, b) Ni@C-400, (c, d) Ni@C-500.

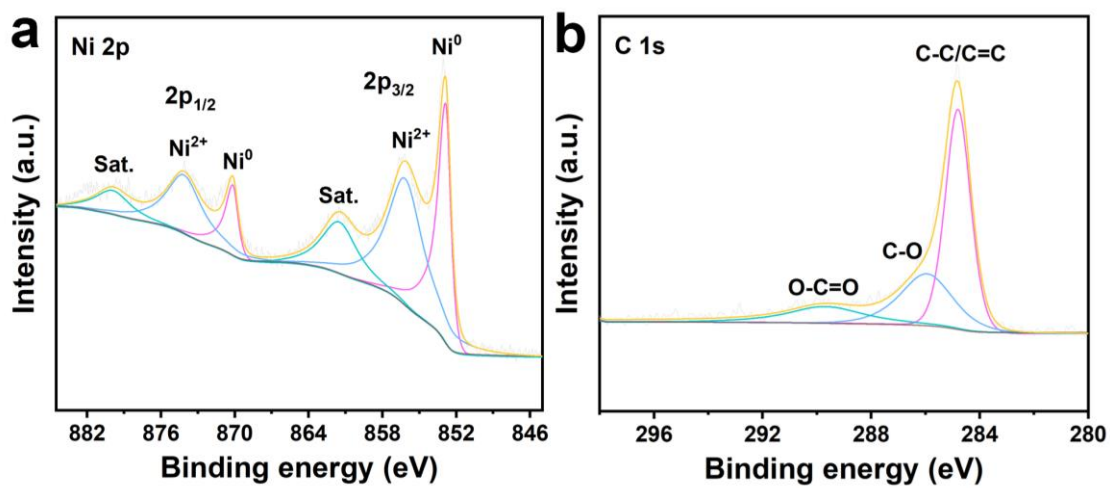

**Fig. S5** XPS spectra of the Ni@C-450: (a) Ni 2p, (b) C 1s.

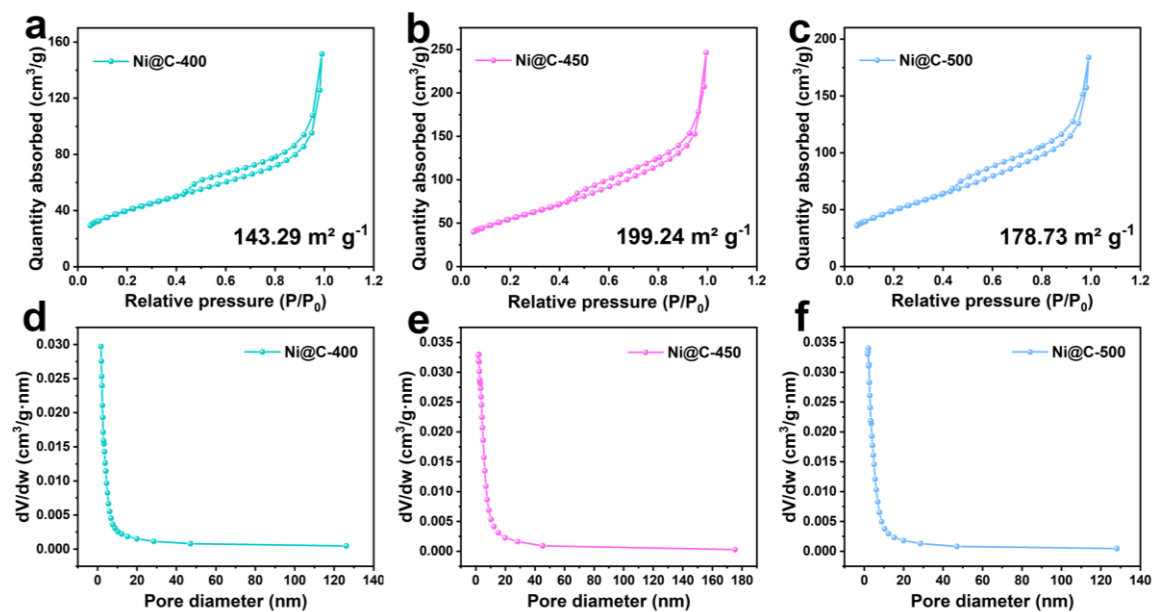

**Fig. S6** N<sub>2</sub> adsorption-desorption isotherms of (a) Ni@C-400, (b) Ni@C-450, (c) Ni@C-500. Pore size distributions of (d) Ni@C-400, (e) Ni@C-450, (f) Ni@C-500.

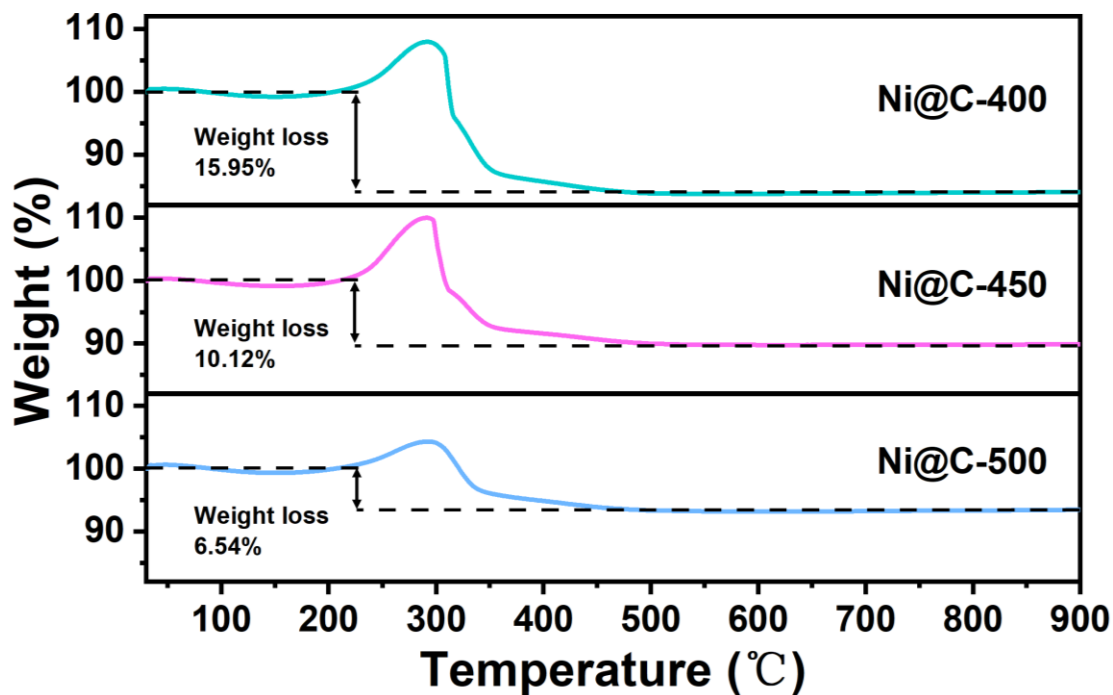

**Fig. S7** TG curves of the Ni@C-400, Ni@C-450 and Ni@C-500. Based on the weight loss in TG result, the proportions of carbon in Ni@C-400, Ni@C-450 and Ni@C-500 were calculated to be 33.95%, 29.37% and 26.56%, respectively.

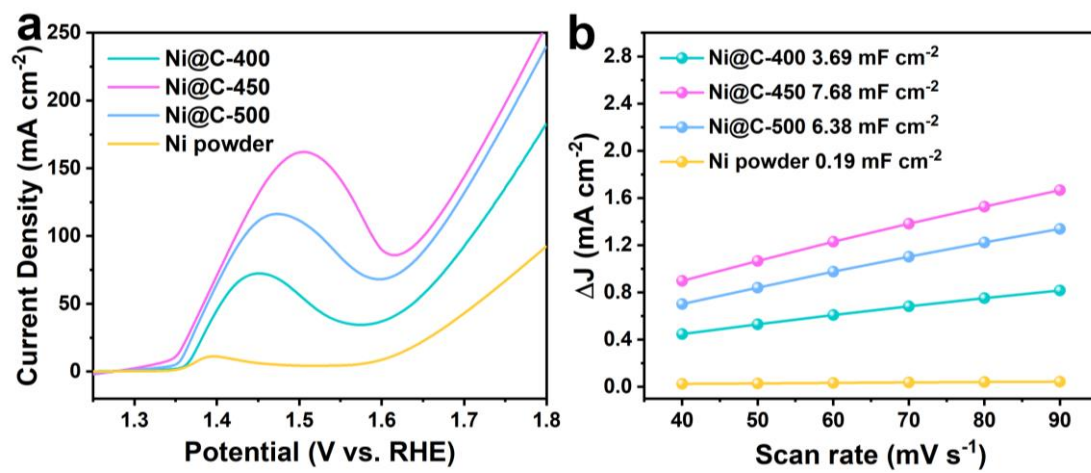

**Fig. S8** (a) LSV curves and (b)  $C_{dl}$  of Ni powder, Ni@C-400, Ni@C-450 and Ni@C-500 in 1.0 M KOH with 10 mM HMF.

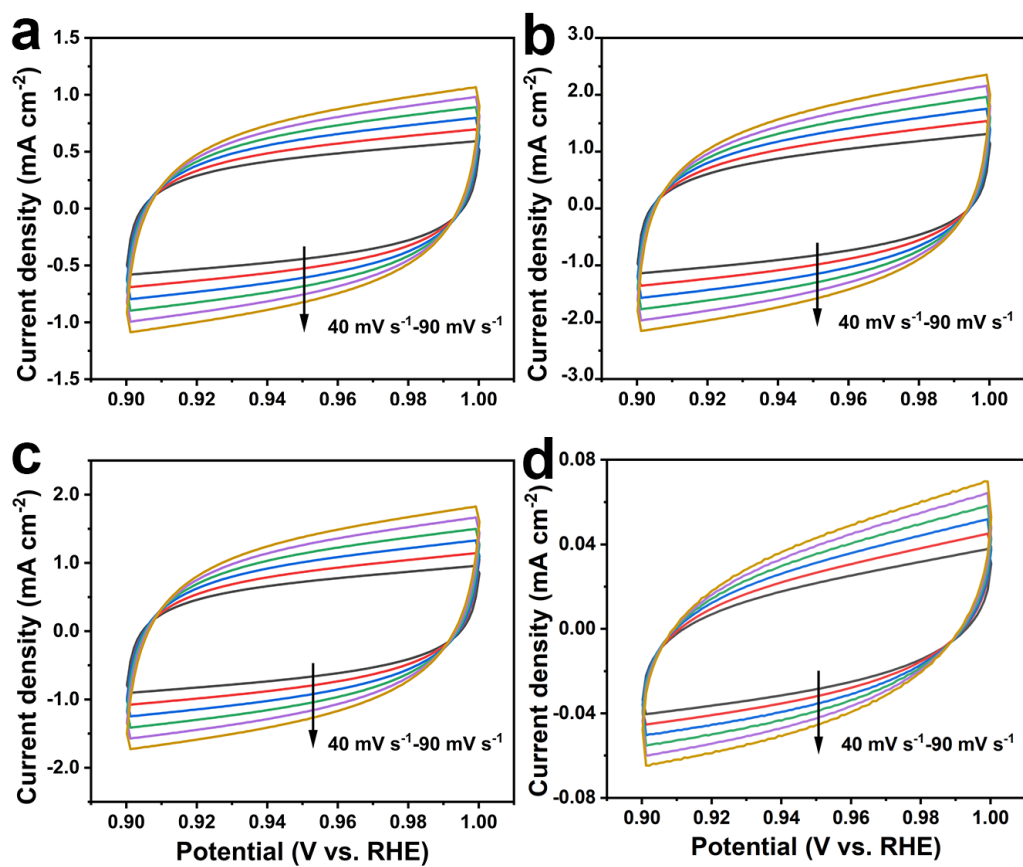

**Fig. S9** Cyclic voltammograms of (a) Ni@C-400, (b) Ni@C-450, (c) Ni@C-500, (d) Ni powder at different scan rates.

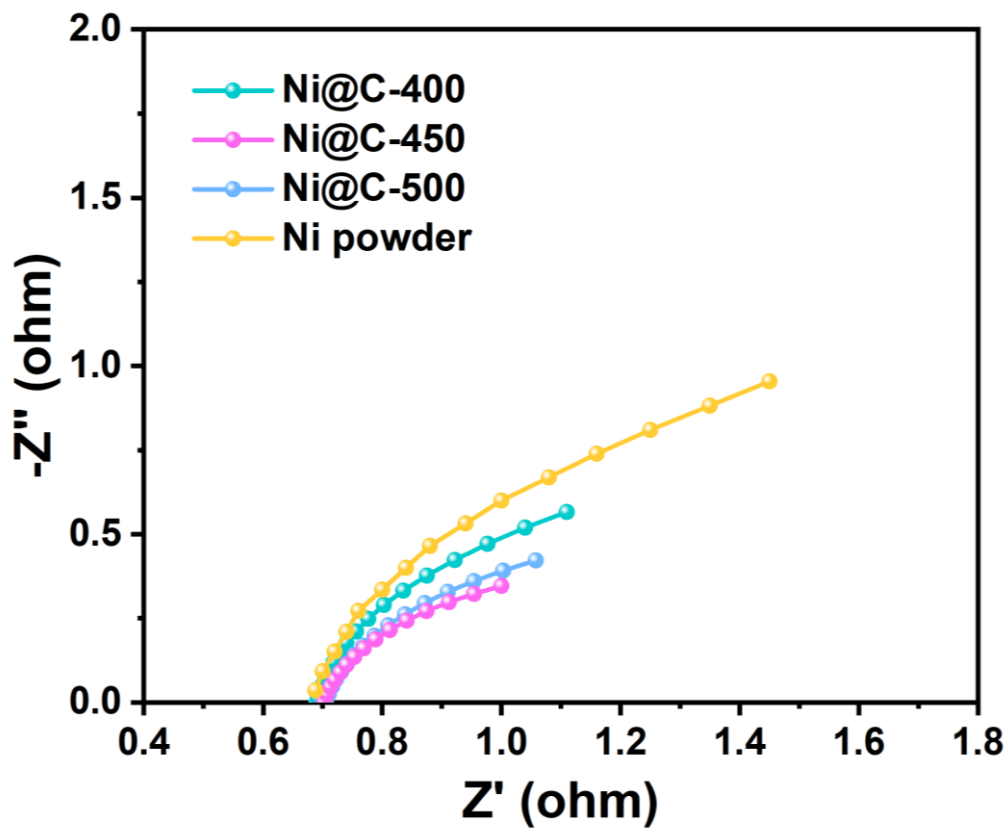

**Fig. S10** Nyquist plots of Ni@C-400, Ni@C-450, Ni@C-500 and Ni powder at 1.34

V.



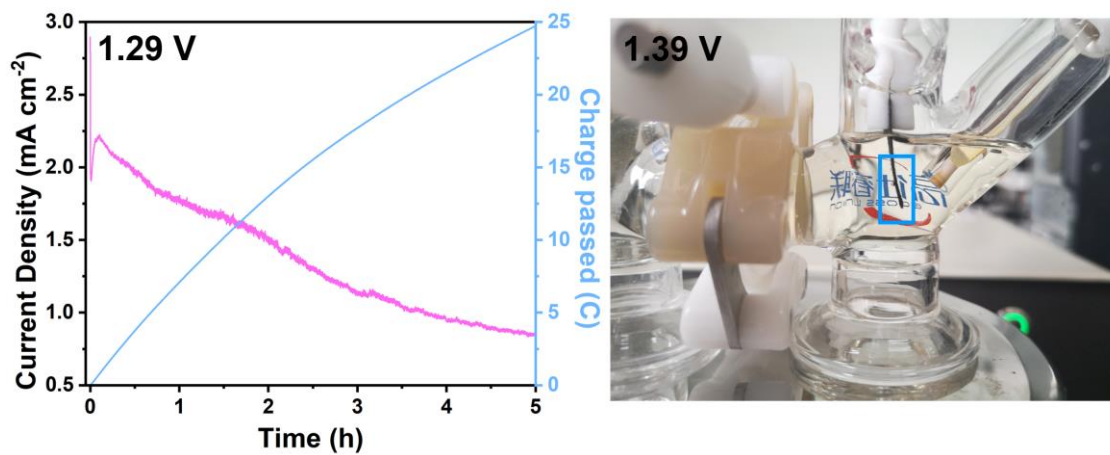

**Fig. S11** (a) Corresponding current change and the accumulated charges over time of the chronoamperometry test of Ni@C-450 at 1.29 V in 1.0 M KOH with 10 mM HMF.

(b) Oxygen generated from the electrode surface at 1.39 V.

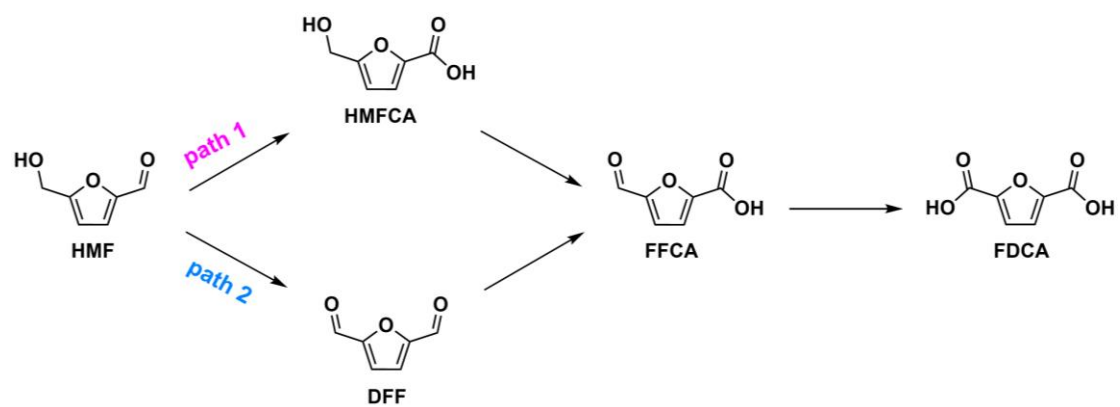

**Fig. S12** Possible pathways for the oxidation of HMF to FDCA.

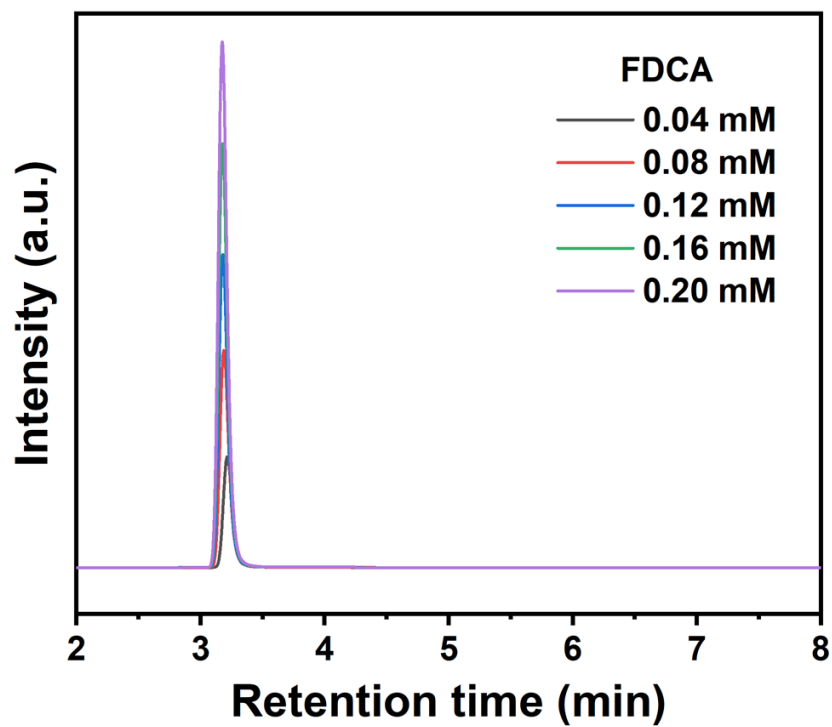

**Fig. S13** HPLC traces of different concentrations of FDCA standard substance.

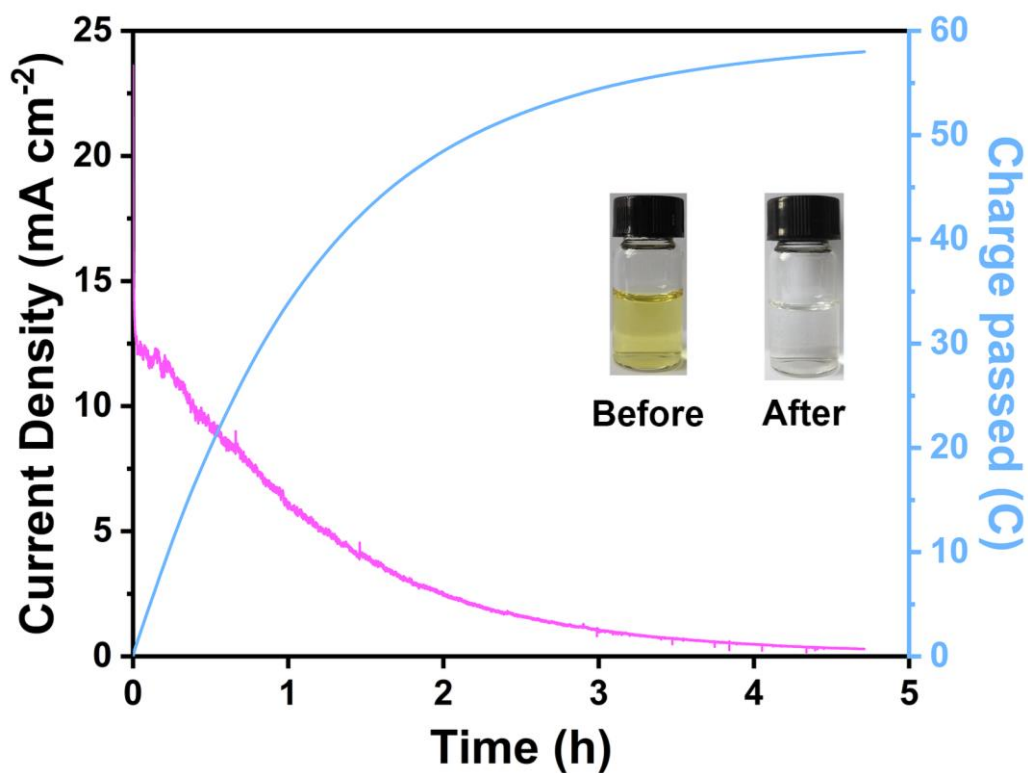

**Fig. S14** Corresponding current change and the accumulated charges over time of the chronoamperometry test of Ni@C-450 at 1.34 V in 1.0 M KOH electrolyte with 10 mM HMF (insets: color change of the electrolyte before and after electrolysis).

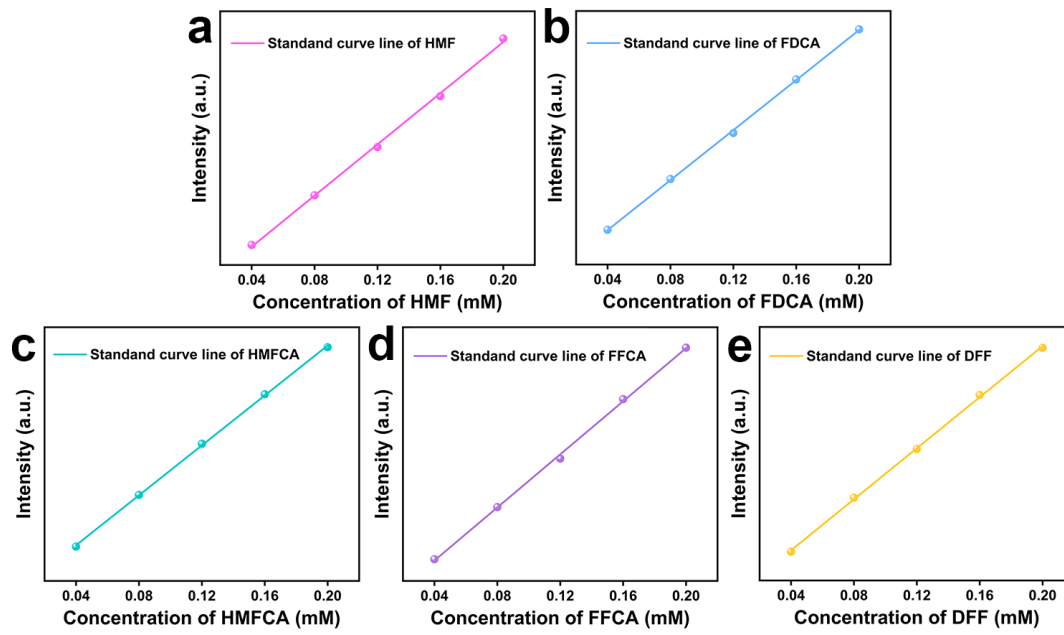

**Fig. S15** Standard curves of the HPLC for (a) HMF, (b) FDCA, (c) HMFCA, (d) FFCA, (e) DFF.

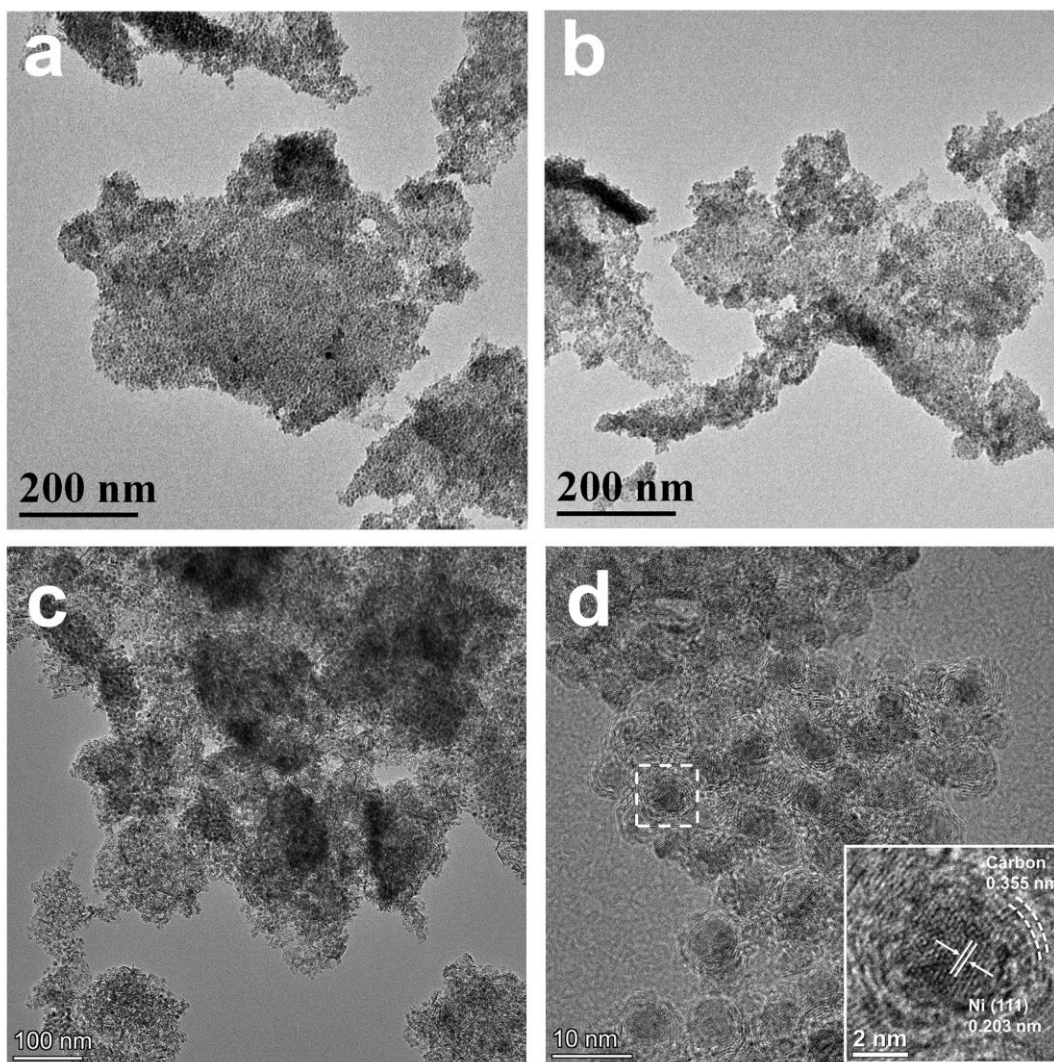

**Fig. S16** (a, b) TEM images of Ni@C-450 after catalysis. (c, d) HRTEM images of Ni@C-450 after catalysis (The marked area represented the inserted HRTEM image).

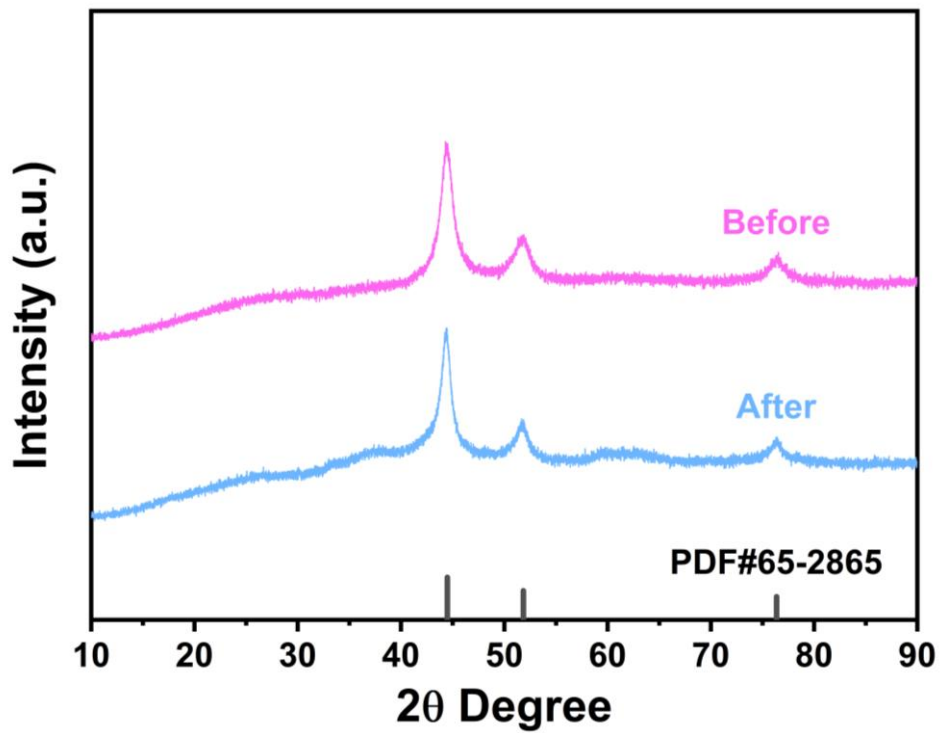

**Fig. S17** XRD patterns of Ni@C-450 before and after electrolysis.

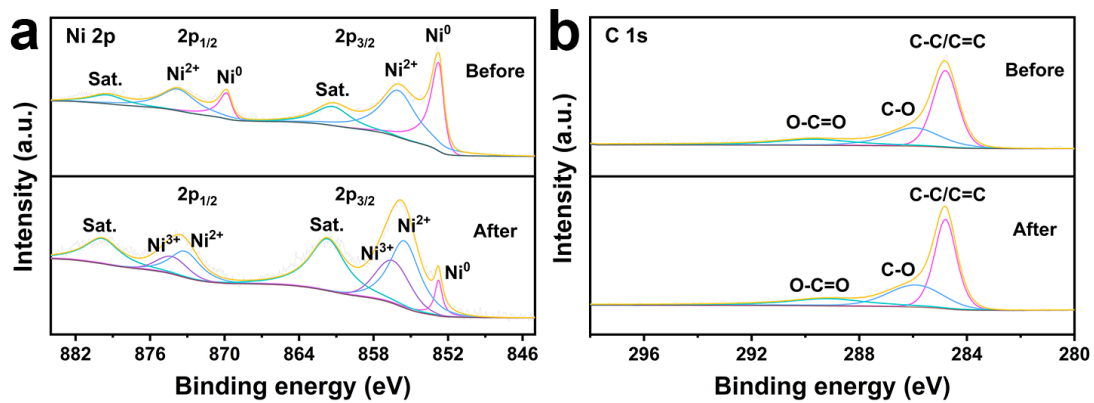

**Fig. S18** XPS spectra of Ni@C-450 before and after electrolysis: (a) Ni 2p, (b) C 1s.



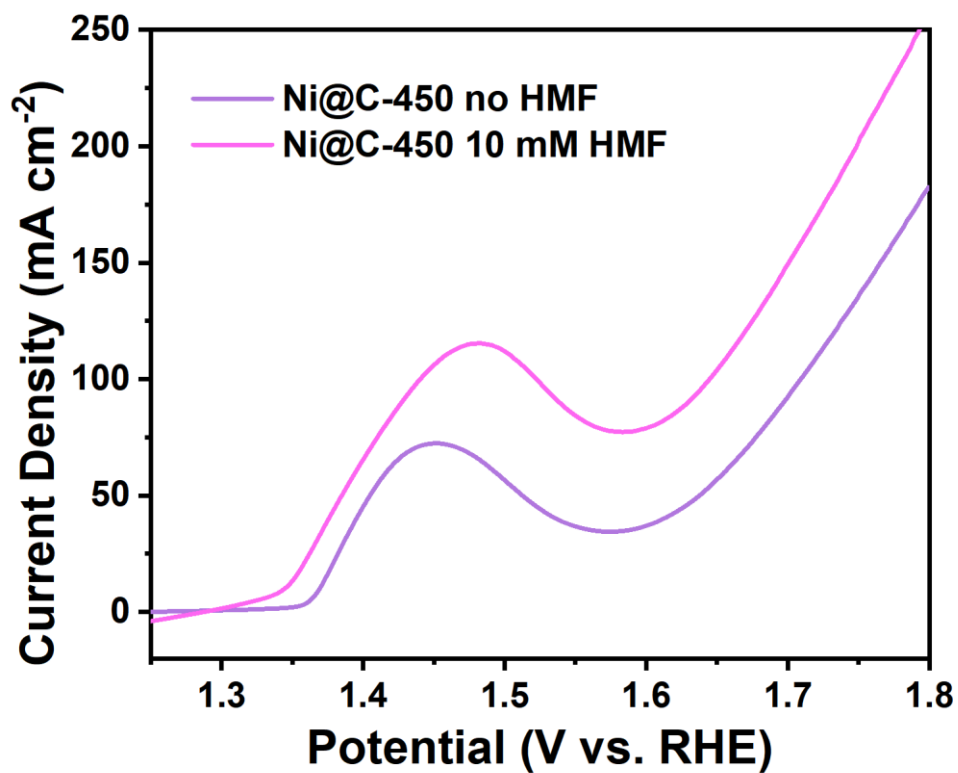

**Fig. S19** LSV curves of Ni@C-450 in 1.0 M KOH electrolyte with and without 10 mM HMF after catalysis.

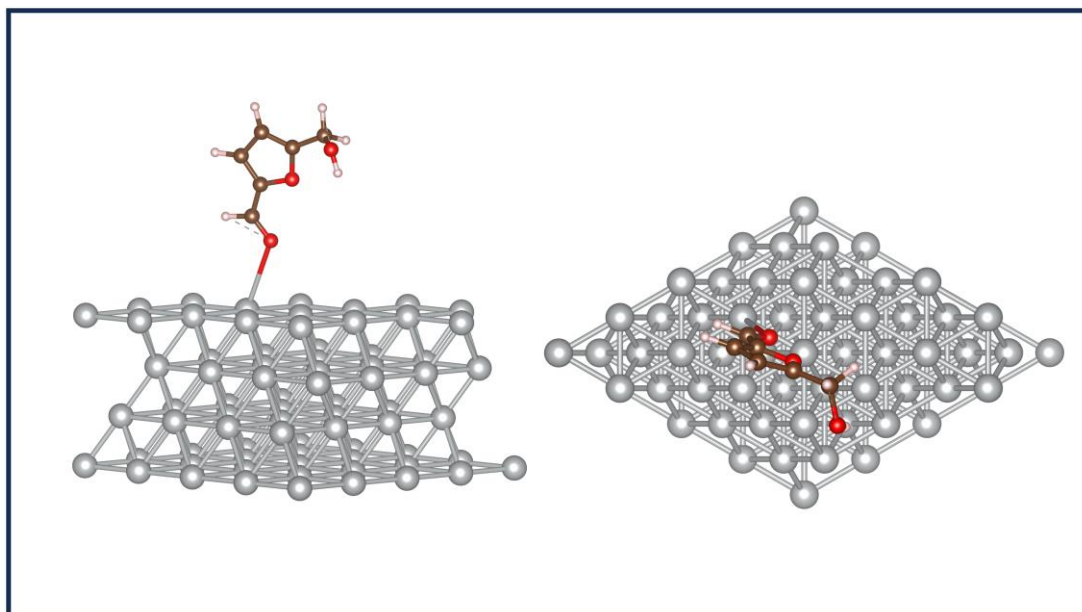

**Fig. S20** Side and top views of an optimized structure of HMF on Ni.

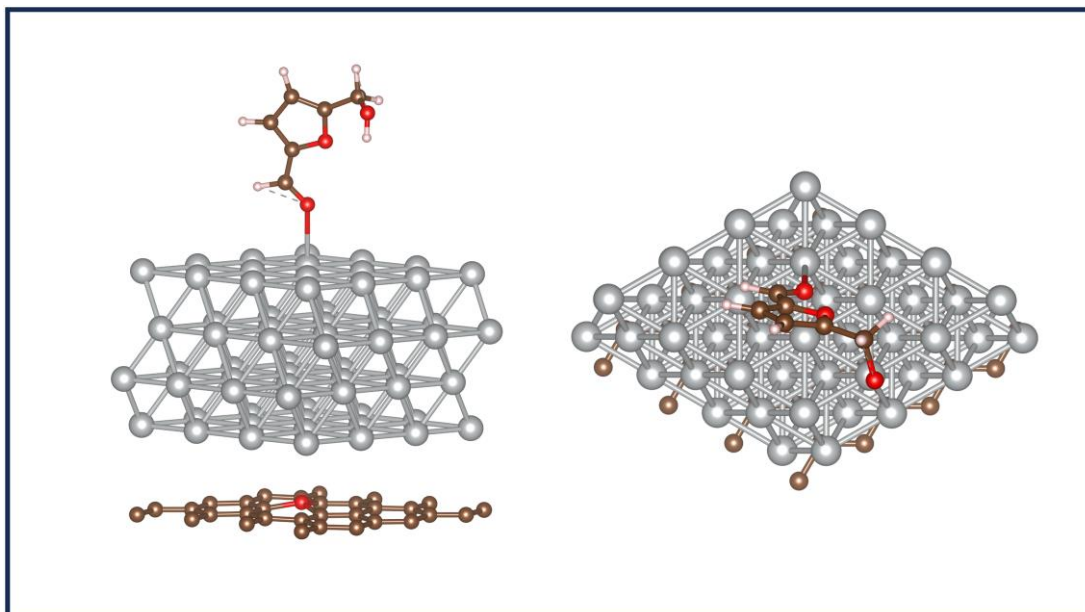

**Fig. S21** Side and top views of an optimized structure of HMF on Ni@C-450.

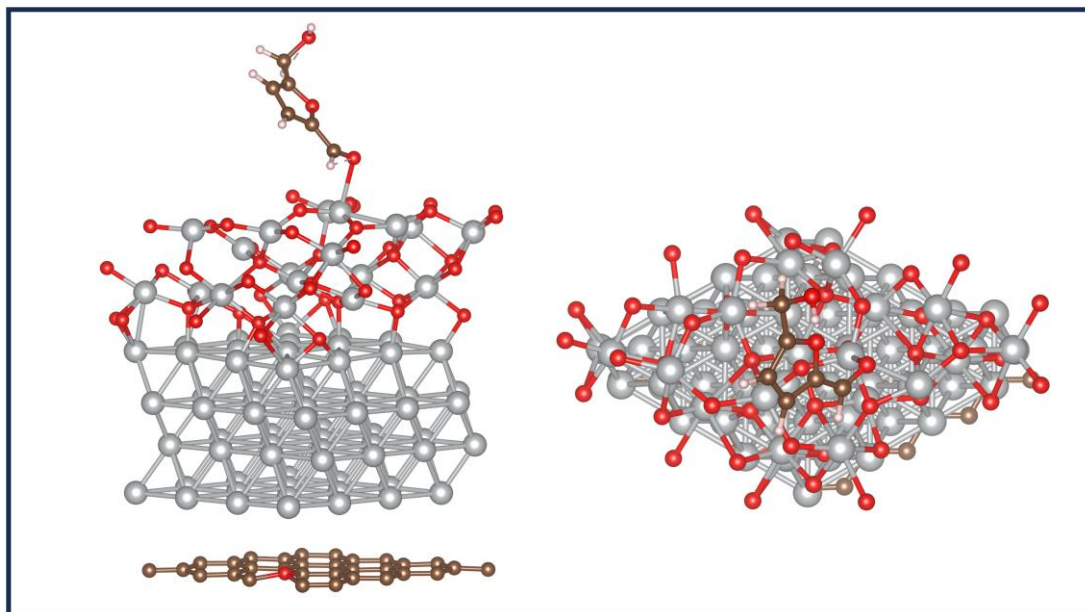

**Fig. S22** Side and top views of an optimized structure of HMF on NiO-Ni@C-450.

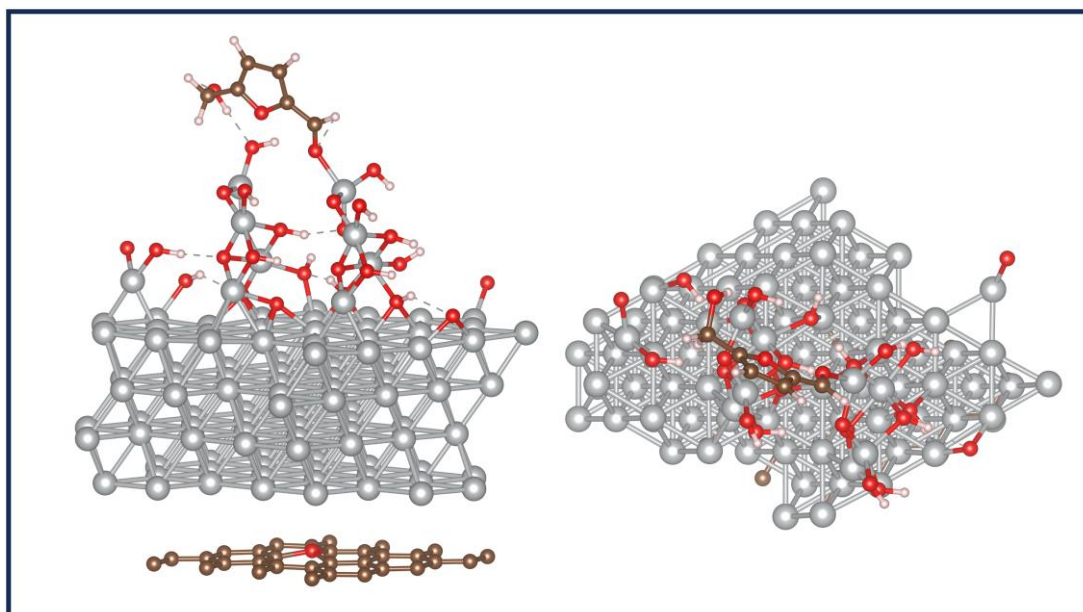

**Fig. S23** Side and top views of an optimized structure of HMF on NiOOH-Ni@C-450.

**Table S1** Recently reported high performance electrocatalytic HMF catalysts.

| Catalysts                                                            | C <sub>HMF</sub><br>(mM) | Potential<br>(V vs.<br>RHE) | Conversion<br>(%) | FDCA<br>Yield<br>(%) | FE<br>(%)   | Reference            |
|----------------------------------------------------------------------|--------------------------|-----------------------------|-------------------|----------------------|-------------|----------------------|
| <b>Ni@C-450</b>                                                      | <b>10</b>                | <b>1.34</b>                 | <b>100</b>        | <b>97.7</b>          | <b>97.4</b> | <b>This<br/>work</b> |
| FeCoNi-S@NF                                                          | 10                       | 1.45                        | 95.68             | 94.83                | 94.71       | 7                    |
| MoO <sub>2</sub> -FeP@C                                              | 10                       | 1.424                       | 99.4              | 98.6                 | 97.8        | 8                    |
| Ni <sub>3</sub> S <sub>2</sub> /MoS <sub>2</sub> /NiMoO <sub>4</sub> | 10                       | 1.393                       | 99.2              | 96.7                 | 96.5        | 9                    |
| NF@Co <sub>3</sub> O <sub>4</sub> /CeO <sub>2</sub>                  | 10                       | 1.40                        | 98.0              | 94.5                 | 97.5        | 10                   |
| NiVCo-LDHs                                                           | 10                       | 1.376                       | ~                 | 99.7                 | 97.0        | 11                   |
| Mn-5Ni <sub>2</sub> P                                                | 10                       | 1.43                        | 100               | 98.0                 | 97.8        | 12                   |
| Co <sub>3</sub> O <sub>4</sub> -NiO-500                              | 10                       | 1.45                        | 96.95             | 83.33                | 89.47       | 13                   |
| NiS <sub>x</sub> /Ni <sub>2</sub> P                                  | 10                       | 1.46                        | ~100              | 98.5                 | 95.1        | 14                   |
| NiSe <sub>2</sub> -NiMoO <sub>4</sub>                                | 10                       | 1.50                        | 98.0              | 96.5                 | 95.6        | 15                   |
| NiO-N/C                                                              | 10                       | 1.473                       | 99                | 84                   | 96          | 16                   |
| Ni(OH) <sub>2</sub> /CB                                              | 10                       | ~                           | ~100              | 98.1                 | ~           | 17                   |
| NiO-CFP                                                              | 10                       | 1.43                        | 82.4              | 79.7                 | 61.0        | 18                   |

**Table S2** Adsorption energy of HMF on different surfaces.

| Adsorbed sites | $E_{ad/sub}$ | $E_{ad}$ | $E_{sub}$ | $E_{ads}$ |
|----------------|--------------|----------|-----------|-----------|
| Ni             | -447.612     | -351.971 | -95.363   | -0.27742  |
| Ni@C-450       | -741.360     | -645.648 | -95.363   | -0.34948  |
| NiO-Ni@C-450   | -1017.076    | -921.331 | -95.363   | -0.38184  |
| NiOOH-Ni@C-450 | -960.044     | -863.832 | -95.363   | -0.84888  |

\*Where  $E_{ad/sub}$ ,  $E_{ad}$ , and  $E_{sub}$  are the total energies of the optimized adsorbate/substrate system, the adsorbate in the gas phase, and the clean substrate, respectively.

**Table S3** Unit-cell and position parameters of the optimized model for the adsorption of HMF on Ni.

| <b>Ni</b>               |          |          |          |
|-------------------------|----------|----------|----------|
| <b>Atom Coordinates</b> | <b>x</b> | <b>y</b> | <b>z</b> |
| <i>a</i> (Å)            |          | 9.82920  |          |
| <i>b</i> (Å)            |          | 9.82920  |          |
| <i>c</i> (Å)            |          | 36.01913 |          |
| $\alpha$ (deg)          |          | 90.0     |          |
| $\beta$ (deg)           |          | 90.0     |          |
| $\gamma$ (deg)          |          | 60.0     |          |
| Ni1                     | 0.00000  | 0.00000  | 0.41644  |
| Ni2                     | 0.83333  | 0.08333  | 0.47215  |
| Ni3                     | 0.08333  | 0.83333  | 0.47215  |
| Ni4                     | 0.08333  | 0.08333  | 0.47215  |
| Ni5                     | 0.83333  | 0.83333  | 0.47215  |
| Ni6                     | 0.00000  | 0.25000  | 0.41644  |
| Ni7                     | 0.25000  | 0.00000  | 0.41644  |
| Ni8                     | 0.25000  | 0.25000  | 0.41644  |
| Ni9                     | 0.83333  | 0.33333  | 0.47215  |
| Ni10                    | 0.00000  | 0.75000  | 0.41644  |
| Ni11                    | 0.25000  | 0.50000  | 0.41644  |
| Ni12                    | 0.25000  | 0.75000  | 0.41644  |
| Ni13                    | 0.00000  | 0.50000  | 0.41644  |
| Ni14                    | 0.83333  | 0.58333  | 0.47215  |
| Ni15                    | 0.08333  | 0.33333  | 0.47215  |
| Ni16                    | 0.08333  | 0.58333  | 0.47215  |
| Ni17                    | 0.33333  | 0.83333  | 0.47215  |
| Ni18                    | 0.50000  | 0.25000  | 0.41644  |
| Ni19                    | 0.75000  | 0.00000  | 0.41644  |
| Ni20                    | 0.75000  | 0.25000  | 0.41644  |
| Ni21                    | 0.50000  | 0.00000  | 0.41644  |
| Ni22                    | 0.33333  | 0.08333  | 0.47215  |
| Ni23                    | 0.58333  | 0.83333  | 0.47215  |



---

|      |          |          |         |
|------|----------|----------|---------|
| Ni24 | 0.58333  | 0.08333  | 0.47215 |
| Ni25 | 0.50000  | 0.50000  | 0.41644 |
| Ni26 | 0.33333  | 0.58333  | 0.47215 |
| Ni27 | 0.58333  | 0.33333  | 0.47215 |
| Ni28 | 0.58333  | 0.58333  | 0.47215 |
| Ni29 | 0.33333  | 0.33333  | 0.47215 |
| Ni30 | 0.50000  | 0.75000  | 0.41644 |
| Ni31 | 0.75000  | 0.50000  | 0.41644 |
| Ni32 | 0.75000  | 0.75000  | 0.41644 |
| Ni33 | 0.66667  | 0.66667  | 0.52785 |
| Ni34 | 0.50027  | 0.75013  | 0.58435 |
| Ni35 | 0.75042  | 0.49992  | 0.58439 |
| Ni36 | 0.75011  | 0.75002  | 0.58447 |
| Ni37 | 0.50050  | 0.49997  | 0.58441 |
| Ni38 | 0.66667  | 0.91667  | 0.52785 |
| Ni39 | 0.91667  | 0.66667  | 0.52785 |
| Ni40 | 0.91667  | 0.91667  | 0.52785 |
| Ni41 | 0.50018  | -0.00010 | 0.58427 |
| Ni42 | 0.66667  | 0.41667  | 0.52785 |
| Ni43 | 0.91667  | 0.16667  | 0.52785 |
| Ni44 | 0.91667  | 0.41667  | 0.52785 |
| Ni45 | 0.66667  | 0.16667  | 0.52785 |
| Ni46 | 0.50039  | 0.24956  | 0.58450 |
| Ni47 | 0.75011  | 0.99991  | 0.58440 |
| Ni48 | 0.75045  | 0.24980  | 0.58436 |
| Ni49 | 0.00018  | 0.49990  | 0.58420 |
| Ni50 | 0.16667  | 0.91667  | 0.52785 |
| Ni51 | 0.41667  | 0.66667  | 0.52785 |
| Ni52 | 0.41667  | 0.91667  | 0.52785 |
| Ni53 | 0.16667  | 0.66667  | 0.52785 |
| Ni54 | -0.00008 | 0.75009  | 0.58435 |
| Ni55 | 0.25030  | 0.49998  | 0.58495 |
| Ni56 | 0.25000  | 0.75029  | 0.58435 |
| Ni57 | 0.16667  | 0.16667  | 0.52785 |

---

---

|      |         |         |         |
|------|---------|---------|---------|
| Ni58 | 0.00024 | 0.24989 | 0.58444 |
| Ni59 | 0.25008 | 0.00008 | 0.58443 |
| Ni60 | 0.25006 | 0.24989 | 0.58433 |
| Ni61 | 0.00005 | 0.00007 | 0.58433 |
| Ni62 | 0.16667 | 0.41667 | 0.52785 |
| Ni63 | 0.41667 | 0.16667 | 0.52785 |
| Ni64 | 0.41667 | 0.41667 | 0.52785 |
| C1   | 0.54048 | 0.41681 | 0.77644 |
| C2   | 0.43823 | 0.37520 | 0.79185 |
| C3   | 0.33870 | 0.37993 | 0.76279 |
| C4   | 0.38621 | 0.42336 | 0.73096 |
| C5   | 0.66919 | 0.43675 | 0.79259 |
| C6   | 0.32511 | 0.44608 | 0.69343 |
| H1   | 0.43580 | 0.34555 | 0.82079 |
| H2   | 0.24297 | 0.35493 | 0.76469 |
| H3   | 0.65960 | 0.43612 | 0.82297 |
| H4   | 0.65349 | 0.55176 | 0.78415 |
| H5   | 0.22354 | 0.42535 | 0.69100 |
| H6   | 0.84616 | 0.32295 | 0.75782 |
| O1   | 0.51018 | 0.44635 | 0.73934 |
| O2   | 0.82477 | 0.31235 | 0.78372 |
| O3   | 0.37520 | 0.48415 | 0.66640 |

---

**Table S4** Unit-cell and position parameters of the optimized model for the adsorption of HMF on Ni@C-450.

| <b>Ni@C-450</b>         |                 |                 |                 |
|-------------------------|-----------------|-----------------|-----------------|
| <b>Atom Coordinates</b> | <b><i>x</i></b> | <b><i>y</i></b> | <b><i>z</i></b> |
| <i>a</i> (Å)            |                 | 9.82920         |                 |
| <i>b</i> (Å)            |                 | 9.82920         |                 |
| <i>c</i> (Å)            |                 | 36.01913        |                 |
| $\alpha$ (deg)          |                 | 90.0            |                 |
| $\beta$ (deg)           |                 | 90.0            |                 |
| $\gamma$ (deg)          |                 | 60.0            |                 |
| C1                      | 0.89141         | 0.92628         | 0.32118         |
| C2                      | 0.97513         | 0.00988         | 0.31986         |
| C3                      | 0.89194         | 0.17663         | 0.31902         |
| C4                      | 0.72418         | 0.26035         | 0.32022         |
| C5                      | 0.64857         | 0.42331         | 0.31969         |
| C6                      | 0.38853         | 0.68328         | 0.32032         |
| C7                      | 0.22553         | 0.75893         | 0.32055         |
| C8                      | 0.22525         | 0.00991         | 0.31876         |
| C9                      | 0.14185         | 0.17668         | 0.31844         |
| C10                     | 0.97511         | 0.26004         | 0.31842         |
| C11                     | 0.89191         | 0.42663         | 0.31906         |
| C12                     | 0.72415         | 0.51071         | 0.32024         |
| C13                     | 0.64231         | 0.67709         | 0.32203         |
| C14                     | 0.47594         | 0.75896         | 0.32068         |
| C15                     | 0.3918          | 0.92676         | 0.31951         |
| C16                     | 0.14188         | 0.92671         | 0.31931         |
| C17                     | 0.39179         | 0.17666         | 0.31952         |
| C18                     | 0.47541         | 0.0099          | 0.32019         |
| C19                     | 0.14088         | 0.67717         | 0.32192         |
| C20                     | 0.22547         | 0.51079         | 0.32057         |
| C21                     | 0.38848         | 0.42338         | 0.32034         |
| C22                     | 0.47592         | 0.26032         | 0.32068         |
| C23                     | 0.64231         | 0.17581         | 0.32199         |

---

|      |         |         |         |
|------|---------|---------|---------|
| C24  | 0.72539 | 0.00966 | 0.32167 |
| C25  | 0.97484 | 0.76019 | 0.32161 |
| C26  | 0.6427  | 0.92626 | 0.32136 |
| C27  | 0.72539 | 0.76019 | 0.32169 |
| C28  | 0.8914  | 0.67752 | 0.3212  |
| C29  | 0.97508 | 0.51021 | 0.3199  |
| C30  | 0.14183 | 0.42665 | 0.31935 |
| C31  | 0.22524 | 0.26006 | 0.31878 |
| Ni1  | 0.17379 | 0.91249 | 0.51785 |
| Ni2  | 0.42374 | 0.66282 | 0.51811 |
| Ni3  | 0.42374 | 0.91253 | 0.51793 |
| Ni4  | 0.17347 | 0.66288 | 0.51803 |
| Ni5  | 0.00704 | 0.74579 | 0.57441 |
| Ni6  | 0.25674 | 0.49602 | 0.57465 |
| Ni7  | 0.25697 | 0.7455  | 0.57553 |
| Ni8  | 0.25694 | 0.99576 | 0.57456 |
| Ni9  | 0.00672 | 0.24586 | 0.57468 |
| Ni10 | 0.00673 | 0.49597 | 0.57449 |
| Ni11 | 0.2567  | 0.24602 | 0.57462 |
| Ni12 | 0.00692 | 0.99583 | 0.57438 |
| Ni13 | 0.17384 | 0.41276 | 0.51785 |
| Ni14 | 0.4237  | 0.41261 | 0.51814 |
| Ni15 | 0.17366 | 0.16274 | 0.51799 |
| Ni16 | 0.42376 | 0.1628  | 0.51793 |
| Ni17 | 0.00792 | 0.99553 | 0.40592 |
| Ni18 | 0.50672 | 0.24611 | 0.57471 |
| Ni19 | 0.50729 | 0.99562 | 0.406   |
| Ni20 | 0.75753 | 0.24559 | 0.40599 |
| Ni21 | 0.75775 | 0.99546 | 0.40569 |
| Ni22 | 0.5081  | 0.2456  | 0.40571 |
| Ni23 | 0.3407  | 0.82898 | 0.46224 |
| Ni24 | 0.09046 | 0.57929 | 0.46222 |
| Ni25 | 0.09044 | 0.32923 | 0.46238 |
| Ni26 | 0.84049 | 0.57907 | 0.46231 |

---

---

|      |         |         |         |
|------|---------|---------|---------|
| Ni27 | 0.00804 | 0.49493 | 0.40593 |
| Ni28 | 0.34054 | 0.07914 | 0.46244 |
| Ni29 | 0.25808 | 0.745   | 0.40604 |
| Ni30 | 0.00818 | 0.74512 | 0.4054  |
| Ni31 | 0.84026 | 0.3292  | 0.46225 |
| Ni32 | 0.25777 | 0.24539 | 0.40609 |
| Ni33 | 0.25774 | 0.99527 | 0.40609 |
| Ni34 | 0.00774 | 0.24539 | 0.40608 |
| Ni35 | 0.84067 | 0.829   | 0.46194 |
| Ni36 | 0.09042 | 0.07913 | 0.46237 |
| Ni37 | 0.09044 | 0.8291  | 0.46221 |
| Ni38 | 0.84044 | 0.07903 | 0.46232 |
| Ni39 | 0.25815 | 0.49533 | 0.40605 |
| Ni40 | 0.59059 | 0.82904 | 0.46224 |
| Ni41 | 0.59057 | 0.07923 | 0.46223 |
| Ni42 | 0.50771 | 0.49537 | 0.40713 |
| Ni43 | 0.67373 | 0.16258 | 0.51806 |
| Ni44 | 0.92357 | 0.41271 | 0.51793 |
| Ni45 | 0.92356 | 0.1628  | 0.51792 |
| Ni46 | 0.67384 | 0.41265 | 0.51805 |
| Ni47 | 0.50705 | 0.99625 | 0.57446 |
| Ni48 | 0.92357 | 0.91259 | 0.51775 |
| Ni49 | 0.92366 | 0.66282 | 0.51774 |
| Ni50 | 0.67387 | 0.91261 | 0.51768 |
| Ni51 | 0.50669 | 0.49601 | 0.57475 |
| Ni52 | 0.75709 | 0.7464  | 0.57447 |
| Ni53 | 0.75668 | 0.49633 | 0.57467 |
| Ni54 | 0.50693 | 0.74612 | 0.57463 |
| Ni55 | 0.67378 | 0.66288 | 0.51804 |
| Ni56 | 0.75772 | 0.7452  | 0.40574 |
| Ni57 | 0.7575  | 0.49537 | 0.40594 |
| Ni58 | 0.50806 | 0.74481 | 0.40574 |
| Ni59 | 0.34068 | 0.32909 | 0.46224 |
| Ni60 | 0.59063 | 0.57941 | 0.46267 |

---

---

|      |         |         |         |
|------|---------|---------|---------|
| Ni61 | 0.59056 | 0.32878 | 0.46269 |
| Ni62 | 0.34018 | 0.57934 | 0.46274 |
| Ni63 | 0.75702 | 0.99616 | 0.57455 |
| Ni64 | 0.75669 | 0.24618 | 0.57463 |
| O1   | 0.47543 | 0.50988 | 0.32769 |
| C1   | 0.50176 | 0.57233 | 0.75782 |
| C2   | 0.41701 | 0.50532 | 0.77094 |
| C3   | 0.32808 | 0.49994 | 0.74046 |
| C4   | 0.36371 | 0.56388 | 0.71028 |
| C5   | 0.62259 | 0.60354 | 0.77409 |
| C6   | 0.30916 | 0.5889  | 0.67221 |
| H1   | 0.42028 | 0.46457 | 0.79917 |
| H2   | 0.24756 | 0.45449 | 0.74035 |
| H3   | 0.62031 | 0.59567 | 0.80446 |
| H4   | 0.59607 | 0.72349 | 0.76663 |
| H5   | 0.22344 | 0.54918 | 0.66628 |
| H6   | 0.7808  | 0.48485 | 0.73581 |
| O1   | 0.46988 | 0.60884 | 0.72103 |
| O2   | 0.77932 | 0.48914 | 0.76285 |
| O3   | 0.35133 | 0.64858 | 0.64777 |

---

**Table S5** Unit-cell and position parameters of the optimized model for the adsorption of HMF on NiO-Ni@C-450.

| <b>NiO-Ni@C-450</b>     |                 |                 |                 |
|-------------------------|-----------------|-----------------|-----------------|
| <b>Atom Coordinates</b> | <b><i>x</i></b> | <b><i>y</i></b> | <b><i>z</i></b> |
| <i>a</i> (Å)            |                 | 9.82920         |                 |
| <i>b</i> (Å)            |                 | 9.82920         |                 |
| <i>c</i> (Å)            |                 | 36.01913        |                 |
| $\alpha$ (deg)          |                 | 90.0            |                 |
| $\beta$ (deg)           |                 | 90.0            |                 |
| $\gamma$ (deg)          |                 | 60.0            |                 |
| C1                      | 0.1471          | 0.51367         | 0.04633         |
| C2                      | 0.48093         | 0.84744         | 0.04393         |
| C3                      | 0.39752         | 0.01403         | 0.04449         |
| C4                      | 0.23077         | 0.09759         | 0.04505         |
| C5                      | 0.14709         | 0.26491         | 0.04634         |
| C6                      | 0.98108         | 0.34757         | 0.04683         |
| C7                      | 0.89839         | 0.51364         | 0.04651         |
| C8                      | 0.98108         | 0.59704         | 0.04682         |
| C9                      | 0.898           | 0.76319         | 0.04714         |
| C10                     | 0.73162         | 0.84771         | 0.04583         |
| C11                     | 0.64417         | 0.01076         | 0.04548         |
| C12                     | 0.48116         | 0.09817         | 0.04571         |
| C13                     | 0.39657         | 0.26456         | 0.04707         |
| C14                     | 0.7311          | 0.59728         | 0.04533         |
| C15                     | 0.64748         | 0.76405         | 0.04467         |
| C16                     | 0.23053         | 0.34757         | 0.04675         |
| C17                     | 0.64749         | 0.51414         | 0.04465         |
| C18                     | 0.39757         | 0.51409         | 0.04445         |
| C19                     | 0.23082         | 0.59726         | 0.04501         |
| C20                     | 0.14763         | 0.76401         | 0.04417         |
| C21                     | 0.97987         | 0.84773         | 0.04536         |
| C22                     | 0.64422         | 0.27066         | 0.04546         |
| C23                     | 0.48122         | 0.34632         | 0.04569         |

---

|      |         |         |         |
|------|---------|---------|---------|
| C24  | 0.90426 | 0.0107  | 0.04484 |
| C25  | 0.39754 | 0.76406 | 0.04359 |
| C26  | 0.23081 | 0.84742 | 0.04357 |
| C27  | 0.14761 | 0.01401 | 0.0442  |
| C28  | 0.97984 | 0.0981  | 0.04539 |
| C29  | 0.898   | 0.26447 | 0.04717 |
| C30  | 0.73163 | 0.34634 | 0.04583 |
| C31  | 0.48094 | 0.5973  | 0.0439  |
| Ni1  | 0.84632 | 0.1668  | 0.18781 |
| Ni2  | 0.75312 | 0.34086 | 0.29813 |
| Ni3  | 0.59637 | 0.91647 | 0.18739 |
| Ni4  | 0.76375 | 0.33219 | 0.13089 |
| Ni5  | 0.01319 | 0.08275 | 0.13109 |
| Ni6  | 0.01341 | 0.33258 | 0.13089 |
| Ni7  | 0.92947 | 0.25026 | 0.24318 |
| Ni8  | 0.00974 | 0.08465 | 0.29838 |
| Ni9  | 0.17925 | 0.75018 | 0.24306 |
| Ni10 | 0.75889 | 0.08127 | 0.29531 |
| Ni11 | 0.92957 | 0.49999 | 0.24282 |
| Ni12 | 0.17935 | 0.2502  | 0.24289 |
| Ni13 | 0.17926 | 0.49998 | 0.24289 |
| Ni14 | 0.76674 | 0.58209 | 0.30248 |
| Ni15 | 0.92954 | 0.00003 | 0.2432  |
| Ni16 | 0.17927 | 0.00009 | 0.24307 |
| Ni17 | 0.84625 | 0.91617 | 0.18783 |
| Ni18 | 0.00733 | 0.33393 | 0.29664 |
| Ni19 | 0.59587 | 0.16673 | 0.18789 |
| Ni20 | 0.0499  | 0.091   | 0.36839 |
| Ni21 | 0.01336 | 0.83203 | 0.30039 |
| Ni22 | 0.84278 | 0.9122  | 0.4391  |
| Ni23 | 0.14393 | 0.48078 | 0.4128  |
| Ni24 | 0.42486 | 0.46852 | 0.38071 |
| Ni25 | 0.5397  | 0.56084 | 0.46376 |
| Ni26 | 0.92942 | 0.74996 | 0.2432  |

---



---

|      |         |         |         |
|------|---------|---------|---------|
| Ni27 | 0.09335 | 0.76294 | 0.37477 |
| Ni28 | 0.18925 | 0.85333 | 0.44872 |
| Ni29 | 0.84321 | 0.21889 | 0.42952 |
| Ni30 | 0.01474 | 0.5847  | 0.2979  |
| Ni31 | 0.77715 | 0.60008 | 0.45263 |
| Ni32 | 0.03472 | 0.37774 | 0.35991 |
| Ni33 | 0.51112 | 0.24665 | 0.44759 |
| Ni34 | 0.76485 | 0.76037 | 0.37609 |
| Ni35 | 0.4239  | 0.0932  | 0.3743  |
| Ni36 | 0.73047 | 0.09668 | 0.36736 |
| Ni37 | 0.54931 | 0.90117 | 0.43817 |
| Ni38 | 0.42015 | 0.78336 | 0.38012 |
| Ni39 | 0.72517 | 0.43807 | 0.36874 |
| Ni40 | 0.22824 | 0.14826 | 0.44476 |
| Ni41 | 0.76341 | 0.08275 | 0.13228 |
| Ni42 | 0.84628 | 0.41643 | 0.18738 |
| Ni43 | 0.5098  | 0.58509 | 0.30401 |
| Ni44 | 0.76349 | 0.83231 | 0.29843 |
| Ni45 | 0.26361 | 0.58291 | 0.13107 |
| Ni46 | 0.67945 | 0.75018 | 0.24308 |
| Ni47 | 0.67939 | 0.99999 | 0.24328 |
| Ni48 | 0.42953 | 0.00015 | 0.243   |
| Ni49 | 0.26446 | 0.5846  | 0.2998  |
| Ni50 | 0.51347 | 0.83452 | 0.30267 |
| Ni51 | 0.25652 | 0.09164 | 0.30181 |
| Ni52 | 0.2634  | 0.83599 | 0.30001 |
| Ni53 | 0.84626 | 0.66661 | 0.18738 |
| Ni54 | 0.50578 | 0.33375 | 0.30257 |
| Ni55 | 0.50962 | 0.08382 | 0.29812 |
| Ni56 | 0.25961 | 0.33844 | 0.29818 |
| Ni57 | 0.42917 | 0.25027 | 0.24318 |
| Ni58 | 0.67943 | 0.49991 | 0.24307 |
| Ni59 | 0.67944 | 0.25021 | 0.24326 |
| Ni60 | 0.42948 | 0.49987 | 0.243   |

---

---

|      |         |         |         |
|------|---------|---------|---------|
| Ni61 | 0.76298 | 0.583   | 0.13115 |
| Ni62 | 0.01322 | 0.83297 | 0.13114 |
| Ni63 | 0.42935 | 0.75013 | 0.24314 |
| Ni64 | 0.76379 | 0.83298 | 0.13086 |
| Ni65 | 0.51384 | 0.08271 | 0.13119 |
| Ni66 | 0.09613 | 0.66641 | 0.18746 |
| Ni67 | 0.34613 | 0.41648 | 0.18736 |
| Ni68 | 0.34611 | 0.66652 | 0.18752 |
| Ni69 | 0.01344 | 0.58285 | 0.13083 |
| Ni70 | 0.26344 | 0.83277 | 0.13123 |
| Ni71 | 0.51344 | 0.58265 | 0.13123 |
| Ni72 | 0.51346 | 0.83278 | 0.13124 |
| Ni73 | 0.09595 | 0.91659 | 0.1874  |
| Ni74 | 0.09637 | 0.41638 | 0.18709 |
| Ni75 | 0.51377 | 0.33238 | 0.13119 |
| Ni76 | 0.59623 | 0.66652 | 0.18759 |
| Ni77 | 0.26373 | 0.08232 | 0.13107 |
| Ni78 | 0.09618 | 0.16645 | 0.18746 |
| Ni79 | 0.34614 | 0.91661 | 0.18752 |
| Ni80 | 0.34615 | 0.16667 | 0.18737 |
| Ni81 | 0.59639 | 0.41636 | 0.18739 |
| Ni82 | 0.26387 | 0.33251 | 0.13054 |
| O1   | 0.43542 | 0.1093  | 0.45712 |
| O2   | 0.27503 | 0.72466 | 0.40304 |
| O3   | 0.66013 | 0.70308 | 0.41202 |
| O4   | 0.642   | 0.3165  | 0.38759 |
| O5   | 0.02283 | 0.84405 | 0.46285 |
| O6   | 0.9805  | 0.68505 | 0.40421 |
| O7   | 0.38937 | 0.758   | 0.46526 |
| O8   | 0.35634 | 0.34875 | 0.4054  |
| O9   | 0.74172 | 0.80221 | 0.4639  |
| O10  | 0.84856 | 0.86085 | 0.34199 |
| O11  | 0.91328 | 0.03979 | 0.39512 |
| O12  | 0.37314 | 0.97052 | 0.40752 |

---

---

|     |         |         |         |
|-----|---------|---------|---------|
| O13 | 0.51001 | 0.583   | 0.35647 |
| O14 | 0.48353 | 0.4198  | 0.46817 |
| O15 | 0.82772 | 0.17021 | 0.33017 |
| O16 | 0.5418  | 0.84805 | 0.3519  |
| O17 | 0.19689 | 0.1591  | 0.3516  |
| O18 | 0.52877 | 0.16977 | 0.34214 |
| O19 | 0.92802 | 0.2965  | 0.38627 |
| O20 | 0.106   | 0.35668 | 0.44121 |
| O21 | 0.0811  | 0.08525 | 0.44732 |
| O22 | 0.7531  | 0.42673 | 0.45366 |
| O23 | 0.82386 | 0.55915 | 0.35333 |
| O24 | 0.13979 | 0.46548 | 0.33744 |
| O25 | 0.13547 | 0.89254 | 0.34274 |
| O26 | 0.73113 | 0.09726 | 0.05284 |
| O27 | 0.73489 | 0.12821 | 0.45501 |
| O28 | 0.68395 | 0.96398 | 0.39962 |
| C1  | 0.36219 | 0.48377 | 0.61269 |
| C2  | 0.44805 | 0.32193 | 0.614   |
| C3  | 0.56936 | 0.27446 | 0.58731 |
| C4  | 0.55096 | 0.41049 | 0.57127 |
| C5  | 0.22191 | 0.60133 | 0.63369 |
| C6  | 0.63548 | 0.43312 | 0.54144 |
| H1  | 0.42396 | 0.24726 | 0.63176 |
| H2  | 0.65877 | 0.15575 | 0.5799  |
| H3  | 0.16738 | 0.53929 | 0.64715 |
| H4  | 0.13553 | 0.68939 | 0.6146  |
| H5  | 0.73067 | 0.32228 | 0.52918 |
| H6  | 0.34314 | 0.61431 | 0.67565 |
| O1  | 0.42413 | 0.53904 | 0.58685 |
| O2  | 0.25636 | 0.68931 | 0.66028 |
| O3  | 0.60428 | 0.56333 | 0.52916 |

---

**Table S6** Unit-cell and position parameters of the optimized model for the adsorption of HMF on NiOOH-Ni@C-450.

| <b>NiOOH-Ni@C-450</b> |                 |                 |                 |
|-----------------------|-----------------|-----------------|-----------------|
| <b>Atom</b>           | <b><i>x</i></b> | <b><i>y</i></b> | <b><i>z</i></b> |
| <i>a</i> (Å)          |                 | 9.82920         |                 |
| <i>b</i> (Å)          |                 | 9.82920         |                 |
| <i>c</i> (Å)          |                 | 36.01913        |                 |
| $\alpha$ (deg)        |                 | 90.0            |                 |
| $\beta$ (deg)         |                 | 90.0            |                 |
| $\gamma$ (deg)        |                 | 60.0            |                 |
| <b>Coordinates</b>    | <b><i>x</i></b> | <b><i>y</i></b> | <b><i>z</i></b> |
| C1                    | 0.89141         | 0.92628         | 0.04077         |
| C2                    | 0.22524         | 0.26006         | 0.03838         |
| C3                    | 0.14183         | 0.42665         | 0.03894         |
| C4                    | 0.8914          | 0.67752         | 0.04079         |
| C5                    | 0.72539         | 0.76019         | 0.04128         |
| C6                    | 0.6427          | 0.92626         | 0.04095         |
| C7                    | 0.97484         | 0.76019         | 0.0412          |
| C8                    | 0.72539         | 0.00966         | 0.04126         |
| C9                    | 0.64231         | 0.17581         | 0.04158         |
| C10                   | 0.47592         | 0.26032         | 0.04028         |
| C11                   | 0.38848         | 0.42338         | 0.03993         |
| C12                   | 0.22547         | 0.51079         | 0.04016         |
| C13                   | 0.14088         | 0.67717         | 0.04151         |
| C14                   | 0.47541         | 0.0099          | 0.03978         |
| C15                   | 0.39179         | 0.17666         | 0.03911         |
| C16                   | 0.97508         | 0.51021         | 0.0395          |
| C17                   | 0.3918          | 0.92676         | 0.0391          |
| C18                   | 0.97513         | 0.00988         | 0.03945         |
| C19                   | 0.89194         | 0.17663         | 0.03861         |
| C20                   | 0.72418         | 0.26035         | 0.03981         |
| C21                   | 0.14188         | 0.92671         | 0.0389          |
| C22                   | 0.38853         | 0.68328         | 0.03991         |
| C23                   | 0.22553         | 0.75893         | 0.04014         |

---

|      |         |         |         |
|------|---------|---------|---------|
| C24  | 0.64857 | 0.42331 | 0.03929 |
| C25  | 0.14185 | 0.17668 | 0.03804 |
| C26  | 0.97511 | 0.26004 | 0.03802 |
| C27  | 0.89191 | 0.42663 | 0.03865 |
| C28  | 0.72415 | 0.51071 | 0.03983 |
| C29  | 0.64231 | 0.67709 | 0.04162 |
| C30  | 0.47594 | 0.75896 | 0.04028 |
| C31  | 0.22525 | 0.00991 | 0.03835 |
| H1   | 0.89641 | 0.57016 | 0.40484 |
| H2   | 0.52211 | 0.83192 | 0.45552 |
| H3   | 0.15541 | 0.82542 | 0.36525 |
| H4   | 0.3941  | 0.67917 | 0.34912 |
| H5   | 0.62178 | 0.87564 | 0.38223 |
| H6   | 0.57977 | 0.13174 | 0.45565 |
| H7   | 0.0941  | 0.26807 | 0.38163 |
| H8   | 0.08617 | 0.72094 | 0.49774 |
| H9   | 0.0927  | 0.18073 | 0.44952 |
| H10  | 0.89741 | 0.55647 | 0.34624 |
| H11  | 0.4186  | 0.52945 | 0.405   |
| H12  | 0.59109 | 0.22724 | 0.38626 |
| Ni1  | 0.76181 | 0.48647 | 0.29342 |
| Ni2  | 0.49368 | 0.75323 | 0.29306 |
| Ni3  | 0.75772 | 0.7452  | 0.12533 |
| Ni4  | 0.67378 | 0.66288 | 0.23763 |
| Ni5  | 0.67387 | 0.91261 | 0.23727 |
| Ni6  | 0.50626 | 0.49381 | 0.29684 |
| Ni7  | 0.92366 | 0.66282 | 0.23734 |
| Ni8  | 0.92357 | 0.91259 | 0.23734 |
| Ni9  | 0.50323 | 0.99643 | 0.29849 |
| Ni10 | 0.67384 | 0.41265 | 0.23764 |
| Ni11 | 0.92356 | 0.1628  | 0.23751 |
| Ni12 | 0.7575  | 0.49537 | 0.12553 |
| Ni13 | 0.74695 | 0.75038 | 0.2947  |
| Ni14 | 0.50806 | 0.74481 | 0.12534 |

---

---

|      |         |         |         |
|------|---------|---------|---------|
| Ni15 | 0.55144 | 0.58478 | 0.45608 |
| Ni16 | 0.59063 | 0.57941 | 0.18226 |
| Ni17 | 0.59056 | 0.32878 | 0.18228 |
| Ni18 | 0.34018 | 0.57934 | 0.18233 |
| Ni19 | 0.75202 | 0.99701 | 0.2939  |
| Ni20 | 0.75596 | 0.24231 | 0.29331 |
| Ni21 | 0.39565 | 0.21467 | 0.34812 |
| Ni22 | 0.85791 | 0.33072 | 0.42049 |
| Ni23 | 0.92357 | 0.41271 | 0.23752 |
| Ni24 | 0.35967 | 0.29902 | 0.42356 |
| Ni25 | 0.06266 | 0.58204 | 0.44933 |
| Ni26 | 0.64811 | 0.61345 | 0.37493 |
| Ni27 | 0.88666 | 0.24747 | 0.34639 |
| Ni28 | 0.19495 | 0.54565 | 0.36953 |
| Ni29 | 0.34068 | 0.32909 | 0.18184 |
| Ni30 | 0.67373 | 0.16258 | 0.23765 |
| Ni31 | 0.09044 | 0.8291  | 0.1818  |
| Ni32 | 0.59057 | 0.07923 | 0.18183 |
| Ni33 | 0.51147 | 0.24246 | 0.29237 |
| Ni34 | 0.00792 | 0.99553 | 0.12552 |
| Ni35 | 0.42376 | 0.1628  | 0.23753 |
| Ni36 | 0.17366 | 0.16274 | 0.23759 |
| Ni37 | 0.4237  | 0.41261 | 0.23773 |
| Ni38 | 0.17384 | 0.41276 | 0.23745 |
| Ni39 | 0.50771 | 0.49537 | 0.12673 |
| Ni40 | 0.25742 | 0.23664 | 0.29346 |
| Ni41 | 0.50729 | 0.99562 | 0.1256  |
| Ni42 | 0.01235 | 0.48464 | 0.29121 |
| Ni43 | 0.25019 | 0.99872 | 0.2941  |
| Ni44 | 0.23775 | 0.75713 | 0.29624 |
| Ni45 | 0.25617 | 0.49135 | 0.29333 |
| Ni46 | 0.99606 | 0.7526  | 0.29357 |
| Ni47 | 0.17347 | 0.66288 | 0.23762 |
| Ni48 | 0.42374 | 0.91253 | 0.23752 |

---

---

|      |         |         |         |
|------|---------|---------|---------|
| Ni49 | 0.42374 | 0.66282 | 0.23771 |
| Ni50 | 0.17379 | 0.91249 | 0.23745 |
| Ni51 | 0.01041 | 0.24153 | 0.29239 |
| Ni52 | 0.75753 | 0.24559 | 0.12558 |
| Ni53 | 0.99691 | 0.00353 | 0.29578 |
| Ni54 | 0.75775 | 0.99546 | 0.12528 |
| Ni55 | 0.25815 | 0.49533 | 0.12564 |
| Ni56 | 0.84044 | 0.07903 | 0.18191 |
| Ni57 | 0.09042 | 0.07913 | 0.18196 |
| Ni58 | 0.84067 | 0.829   | 0.18153 |
| Ni59 | 0.00774 | 0.24539 | 0.12567 |
| Ni60 | 0.25774 | 0.99527 | 0.12568 |
| Ni61 | 0.25777 | 0.24539 | 0.12569 |
| Ni62 | 0.84026 | 0.3292  | 0.18184 |
| Ni63 | 0.59059 | 0.82904 | 0.18183 |
| Ni64 | 0.25808 | 0.745   | 0.12563 |
| Ni65 | 0.00818 | 0.74512 | 0.12499 |
| Ni66 | 0.3407  | 0.82898 | 0.18184 |
| Ni67 | 0.09046 | 0.57929 | 0.18181 |
| Ni68 | 0.5081  | 0.2456  | 0.12531 |
| Ni69 | 0.84049 | 0.57907 | 0.1819  |
| Ni70 | 0.00804 | 0.49493 | 0.12552 |
| Ni71 | 0.34054 | 0.07914 | 0.18204 |
| Ni72 | 0.09044 | 0.32923 | 0.18197 |
| O1   | 0.79132 | 0.59465 | 0.33591 |
| O2   | 0.80627 | 0.55243 | 0.41167 |
| O3   | 0.42423 | 0.39307 | 0.32965 |
| O4   | 0.72776 | 0.3807  | 0.37672 |
| O5   | 0.21925 | 0.72874 | 0.35122 |
| O6   | 0.50243 | 0.6373  | 0.33667 |
| O7   | 0.23049 | 0.33557 | 0.37936 |
| O8   | 0.07124 | 0.5821  | 0.32708 |
| O9   | 0.5096  | 0.76876 | 0.47482 |
| O10  | 0.98486 | 0.22489 | 0.4588  |

---

---

|     |         |         |         |
|-----|---------|---------|---------|
| O11 | 0.56363 | 0.83767 | 0.36752 |
| O12 | 0.00498 | 0.6963  | 0.49031 |
| O13 | 0.49922 | 0.63809 | 0.41011 |
| O14 | 0.53306 | 0.17149 | 0.39105 |
| O15 | 0.02599 | 0.22046 | 0.38557 |
| O16 | 0.0219  | 0.63336 | 0.40349 |
| O17 | 0.18195 | 0.38458 | 0.45062 |
| O18 | 0.47543 | 0.50988 | 0.04729 |
| O19 | 0.69718 | 0.39103 | 0.45259 |
| O20 | 0.33232 | 0.50317 | 0.40905 |
| O21 | 0.47052 | 0.19526 | 0.46397 |
| C1  | 0.20214 | 0.43084 | 0.5678  |
| C2  | 0.28852 | 0.39299 | 0.60041 |
| C3  | 0.41999 | 0.41096 | 0.5933  |
| C4  | 0.40674 | 0.46036 | 0.55672 |
| C5  | 0.05195 | 0.43889 | 0.55658 |
| C6  | 0.50033 | 0.49751 | 0.53333 |
| H1  | 0.2593  | 0.35595 | 0.62611 |
| H2  | 0.51396 | 0.39137 | 0.61223 |
| H3  | 0.02235 | 0.37613 | 0.57738 |
| H4  | 0.06986 | 0.37814 | 0.52964 |
| H5  | 0.61052 | 0.48495 | 0.54473 |
| H6  | 0.9366  | 0.64417 | 0.53199 |
| O1  | 0.27311 | 0.47218 | 0.54137 |
| O2  | 0.9241  | 0.59671 | 0.55515 |
| O3  | 0.45706 | 0.54394 | 0.50094 |

---



## References

- 1 J. Bi, H. Ying, H. Xu, X. Zhao, X. Du, J. Hao and Z. Li, *Chem. Commun.*, 2022, **58**, 7817–7820.
- 2 G. Kresse and J. Hafner, *Phys. Rev. B*, 1993, **47**, 558–561.
- 3 G. Kresse and J. Hafner, *Phys. Rev. B*, 1994, **49**, 14251–14269.
- 4 J. P. Perdew, K. Burke and M. Ernzerhof, *Phys. Rev. Lett.*, 1996, **77**, 3865–3868.
- 5 G. Kresse and D. Joubert, *Phys. Rev. B*, 1999, **59**, 1758–1775.
- 6 P. E. Blöchl, *Phys. Rev. B*, 1994, **50**, 17953–17979.
- 7 Z. Lin, L. Wang, T. Jia, X. Wang, C. Li, H. Wang, L. Li, Y. Zhou, C. Zhai, H. Tao and S. Li, *Chem. Eng. J.*, 2024, **481**, 148429.
- 8 G. Yang, Y. Jiao, H. Yan, Y. Xie, A. Wu, X. Dong, D. Guo, C. Tian and H. Fu, *Adv. Mater.*, 2020, **32**, 2000455.
- 9 Y. Sun, Y. Bao, X. Bu, K. Yue, H. Zhang, Y. Zhang, D. Yin, S. Yang, J. C. Ho and X. Wang, *Mater. Today Energy*, 2024, **39**, 101463.
- 10 G. Zhao, G. Hai, P. Zhou, Z. Liu, Y. Zhang, B. Peng, W. Xia, X. Huang and G. Wang, *Adv. Funct. Mater.*, 2023, **33**, 2213170.
- 11 L. Gao, X. Wen, S. Liu, D. Qu, Y. Ma, J. Feng, Z. Zhong, H. Guan and L. Niu, *J. Mater. Chem. A*, 2022, **10**, 21135–21141.
- 12 H. Xu, J. Bi, T. Sang, W. Wang, J. Hao and Z. Li, *Chem. Commun.*, 2023, **59**, 8440–8443.
- 13 P. Jin, L. Zhang, Z. Wu, B. Zhou, Z. Duan, H. Li, H. Liu, A. Deng, Q. Li, Y. Zhang, C. Zhao and S. Wang, *Chem. Eng. J.*, 2024, **481**, 148303.
- 14 B. Zhang, H. Fu and T. Mu, *Green Chem.*, 2022, **24**, 877–884.
- 15 N. Shang, W. Li, Q. Wu, H. Li, H. Wang, C. Wang and G. Bai, *J. Colloid Interface Sci.*, 2024, **659**, 621–628.
- 16 W. Wang, Z. Zhang and M. Wang, *Biomass Convers. Biorefin.*, 2023, **13**, 17247–17254.
- 17 M. Yuan, W. Lu, G. Zhang and F. Cao, *Chem. Eng. J.*, 2023, **472**, 145149.
- 18 Y. Zhong, R. Ren, L. Qin, J. Wang, Y. Peng, Q. Li and Y. Fan, *New J. Chem.*, 2021, **45**, 11213–11221.
